# Supplementary material for: Glycolytically impaired Drosophila glial cells fuel neural metabolism via β-oxidation
Source: Nat Commun. 2023 May 24;14:2996. doi: 10.1038/s41467-023-38813-x (PMC10209077; doi:10.1038/s41467-023-38813-x)
Supplement: Supplementary file 5 — Supplementary data 2 [file 41467_2023_38813_MOESM5_ESM.xlsx]

## Sheet: PG
species	carbons	saturation	genotype	sample 1	sample 2	sample 3
PG	30	1	GFP, cherry	0	0	0
PG	32	1	GFP, cherry	2.134	2.65178	2.94259
PG	32	2	GFP, cherry	2.95701	3.8766	3.84689
PG	32	3	GFP, cherry	0	0	0
PG	34	0	GFP, cherry	0.611244	0.769586	0.658456
PG	34	1	GFP, cherry	2.46978	3.68878	3.55264
PG	34	2	GFP, cherry	6.40312	8.08756	7.23148
PG	34	3	GFP, cherry	1.71217	2.08177	2.29467
PG	36	2	GFP, cherry	1.20979	1.68529	1.861
PG	36	3	GFP, cherry	1.42455	2.35065	2.37423
PG	36	4	GFP, cherry	1.77088	2.5286	2.0117
PG	36	5	GFP, cherry	0	0	0
PG	30	1	Pyk, cherry	0	0	0
PG	32	1	Pyk, cherry	3.20896	2.1857	3.24968
PG	32	2	Pyk, cherry	4.02136	3.08197	4.08732
PG	32	3	Pyk, cherry	0	0	0
PG	34	0	Pyk, cherry	0	0.868092	0.687944
PG	34	1	Pyk, cherry	3.7055	3.25854	3.986
PG	34	2	Pyk, cherry	6.9807	5.31454	7.06012
PG	34	3	Pyk, cherry	2.09436	1.83194	2.18593
PG	36	2	Pyk, cherry	1.30294	0	1.82801
PG	36	3	Pyk, cherry	2.1418	1.68766	2.25193
PG	36	4	Pyk, cherry	2.22654	1.80033	2.55633
PG	36	5	Pyk, cherry	0	0	0
PG	30	1	CPT2, Pyk	0	0	0
PG	32	1	CPT2, Pyk	1.7221	2.87269	2.08439
PG	32	2	CPT2, Pyk	1.81067	2.70373	2.02317
PG	32	3	CPT2, Pyk	0	0	0
PG	34	0	CPT2, Pyk	0.578006	0.651656	0.542659
PG	34	1	CPT2, Pyk	2.8604	3.81288	3.529
PG	34	2	CPT2, Pyk	3.04146	5.14983	3.84032
PG	34	3	CPT2, Pyk	0	1.21875	0
PG	36	2	CPT2, Pyk	0	1.43974	0
PG	36	3	CPT2, Pyk	0	1.91039	1.10493
PG	36	4	CPT2, Pyk	0	1.57847	1.32497
PG	36	5	CPT2, Pyk	0	0	0
PG	30	1	Mtpα, Pyk	0	0	0
PG	32	1	Mtpα, Pyk	3.66121	3.01219	3.76816
PG	32	2	Mtpα, Pyk	3.25298	2.77799	3.70045
PG	32	3	Mtpα, Pyk	0	0	0
PG	34	0	Mtpα, Pyk	0.634866	0	0.981526
PG	34	1	Mtpα, Pyk	3.59661	3.3651	3.49038
PG	34	2	Mtpα, Pyk	6.82268	6.25928	6.59564
PG	34	3	Mtpα, Pyk	1.88686	1.8447	2.21283
PG	36	2	Mtpα, Pyk	1.61495	1.15029	1.30866
PG	36	3	Mtpα, Pyk	2.17692	2.16275	2.38767
PG	36	4	Mtpα, Pyk	2.04767	2.3881	2.63271
PG	36	5	Mtpα, Pyk	0	0	0
PG	30	1	CPT2, cherry	0	0	0
PG	32	1	CPT2, cherry	3.02063	3.29699	3.2611
PG	32	2	CPT2, cherry	3.94184	3.84476	4.157
PG	32	3	CPT2, cherry	0	0	0
PG	34	0	CPT2, cherry	0.86216	0	0.748022
PG	34	1	CPT2, cherry	3.37188	3.63374	4.19032
PG	34	2	CPT2, cherry	6.91779	7.80666	8.20827
PG	34	3	CPT2, cherry	2.36347	2.85999	2.59376
PG	36	2	CPT2, cherry	1.69323	1.94867	1.99347
PG	36	3	CPT2, cherry	2.85437	2.71595	2.82111
PG	36	4	CPT2, cherry	2.16981	2.86304	3.17815
PG	36	5	CPT2, cherry	0	0	0
PG	30	1	Mtpα, cherry	0	0	0
PG	32	1	Mtpα, cherry	1.96532	2.89857	3.03464
PG	32	2	Mtpα, cherry	2.54432	2.91531	4.22938
PG	32	3	Mtpα, cherry	0	0	0
PG	34	0	Mtpα, cherry	0.833301	0.656042	0.823232
PG	34	1	Mtpα, cherry	2.3087	2.92924	3.6581
PG	34	2	Mtpα, cherry	4.71853	6.11996	8.0548
PG	34	3	Mtpα, cherry	1.65167	1.86854	2.79659
PG	36	2	Mtpα, cherry	1.03147	1.12559	1.44332
PG	36	3	Mtpα, cherry	1.46153	2.23847	2.67904
PG	36	4	Mtpα, cherry	1.4203	2.14826	2.7416
PG	36	5	Mtpα, cherry	0	0	0

## Sheet: plasmalipids
CNS
species	carbons	n saturation	Genotype
PI	32	0	GFP, cherry	1.23761	1.10005	0
PI	32	1	GFP, cherry	0	0	0
PI	34	1	GFP, cherry	0	0	0
PI	34	2	GFP, cherry	2.7677	5.19623	4.75668
PI	34	3	GFP, cherry	5.91817	9.7099	9.22175
PI	34	4	GFP, cherry	0	2.90654	0
PI	36	2	GFP, cherry	4.57288	5.5713	5.50844
PI	36	3	GFP, cherry	25.6443	37.3982	36.4275
PI	36	4	GFP, cherry	49.2491	76.9669	68.025
PI	36	5	GFP, cherry	11.7942	15.127	15.5737
PI	36	6	GFP, cherry	10.4766	15.5675	14.2938
PI	32	0	Pyk, cherry	0	0	1.14387
PI	32	1	Pyk, cherry	0	0	0
PI	34	1	Pyk, cherry	3.37601	0	3.08707
PI	34	2	Pyk, cherry	7.38097	4.84628	7.39899
PI	34	3	Pyk, cherry	9.26862	7.48416	9.14554
PI	34	4	Pyk, cherry	0	0	0
PI	36	2	Pyk, cherry	6.64343	5.03758	8.25493
PI	36	3	Pyk, cherry	34.9872	28.254	36.9512
PI	36	4	Pyk, cherry	83.7236	66.9922	82.8657
PI	36	5	Pyk, cherry	14.4437	10.8077	14.6199
PI	36	6	Pyk, cherry	12.9156	10.1697	12.9295
PI	32	0	CPT2, Pyk	0	0	0
PI	32	1	CPT2, Pyk	0	3.00205	0
PI	34	1	CPT2, Pyk	0	4.47654	0
PI	34	2	CPT2, Pyk	4.73305	10.3669	7.20389
PI	34	3	CPT2, Pyk	5.49254	10.4327	7.54428
PI	34	4	CPT2, Pyk	0	0	0
PI	36	2	CPT2, Pyk	5.55146	10.2071	6.38279
PI	36	3	CPT2, Pyk	21.2025	35.0377	24.753
PI	36	4	CPT2, Pyk	35.1048	67.935	44.4095
PI	36	5	CPT2, Pyk	6.10849	10.8079	8.14933
PI	36	6	CPT2, Pyk	4.21835	8.96705	6.56268
PI	32	0	Mtpα, Pyk	0	1.39488	0
PI	32	1	Mtpα, Pyk	0	3.14749	0
PI	34	1	Mtpα, Pyk	0	4.04243	3.82211
PI	34	2	Mtpα, Pyk	4.74754	7.91301	7.30584
PI	34	3	Mtpα, Pyk	8.90823	10.659	9.67473
PI	34	4	Mtpα, Pyk	2.67578	4.57423	3.6008
PI	36	2	Mtpα, Pyk	6.52532	8.31496	6.85162
PI	36	3	Mtpα, Pyk	29.6428	33.9395	31.2688
PI	36	4	Mtpα, Pyk	62.3184	77.7106	69.0259
PI	36	5	Mtpα, Pyk	14.7042	14.079	14.0673
PI	36	6	Mtpα, Pyk	11.8949	14.5874	11.6943
PI	32	0	CPT2, cherry	0	0.810724	0
PI	32	1	CPT2, cherry	0	0	0
PI	34	1	CPT2, cherry	4.22759	4.71028	3.86718
PI	34	2	CPT2, cherry	9.00929	9.93494	11.259
PI	34	3	CPT2, cherry	10.801	13.1903	12.6203
PI	34	4	CPT2, cherry	0	0	0
PI	36	2	CPT2, cherry	8.3226	9.36402	10.0077
PI	36	3	CPT2, cherry	42.7024	49.4247	48.9206
PI	36	4	CPT2, cherry	84.2166	100.184	97.5245
PI	36	5	CPT2, cherry	16.2935	19.4571	18.428
PI	36	6	CPT2, cherry	11.5251	16.8719	14.2022
PI	32	0	Mtpα, cherry	0	0	0
PI	32	1	Mtpα, cherry	0	0	0
PI	34	1	Mtpα, cherry	2.7476	3.691	0
PI	34	2	Mtpα, cherry	4.14308	5.65748	6.56269
PI	34	3	Mtpα, cherry	6.49444	8.10128	10.6531
PI	34	4	Mtpα, cherry	0	0	0
PI	36	2	Mtpα, cherry	6.34105	6.11383	8.67257
PI	36	3	Mtpα, cherry	26.5501	29.048	39.5541
PI	36	4	Mtpα, cherry	46.0111	63.4847	73.4455
PI	36	5	Mtpα, cherry	11.1816	11.6745	16.8284
PI	36	6	Mtpα, cherry	8.21303	11.0698	14.4902
PS	34	0	GFP, cherry	1.9599	2.69528	2.98022
PS	34	1	GFP, cherry	7.16587	10.7989	9.09707
PS	34	2	GFP, cherry	4.98428	7.35956	6.83163
PS	34	3	GFP, cherry	7.69344	11.2889	10.3696
PS	34	4	GFP, cherry	0	0	0
PS	36	1	GFP, cherry	18.6749	26.6835	28.1338
PS	36	2	GFP, cherry	50.2631	75.4042	68.1657
PS	36	3	GFP, cherry	77.0547	104.378	107.56
PS	36	4	GFP, cherry	58.1231	86.5528	74.2781
PS	36	5	GFP, cherry	43.6061	56.4612	55.9971
PS	36	6	GFP, cherry	88.7547	134.821	120.883
PS	38	3	GFP, cherry	6.05493	7.55709	9.36789
PS	34	0	Pyk, cherry	2.87799	2.64675	4.01259
PS	34	1	Pyk, cherry	10.9352	7.9601	11.7359
PS	34	2	Pyk, cherry	8.15601	5.25085	8.05034
PS	34	3	Pyk, cherry	12.6817	8.60306	12.3071
PS	34	4	Pyk, cherry	0	0	0
PS	36	1	Pyk, cherry	31.2963	24.0028	33.1174
PS	36	2	Pyk, cherry	90.908	65.9373	93.1897
PS	36	3	Pyk, cherry	100.069	73.9335	102.134
PS	36	4	Pyk, cherry	89.9281	64.8966	92.9984
PS	36	5	Pyk, cherry	58.1496	41.0232	58.3464
PS	36	6	Pyk, cherry	129.951	95.4538	127.463
PS	38	3	Pyk, cherry	7.85698	10.6053	8.03682
PS	34	0	CPT2, Pyk	1.40499	2.8236	2.18357
PS	34	1	CPT2, Pyk	4.3266	10.6798	7.8267
PS	34	2	CPT2, Pyk	0	8.83434	6.81239
PS	34	3	CPT2, Pyk	0	10.4834	5.47344
PS	34	4	CPT2, Pyk	0	0	0
PS	36	1	CPT2, Pyk	12.8995	23.4149	18.5569
PS	36	2	CPT2, Pyk	29.826	62.7069	45.684
PS	36	3	CPT2, Pyk	33.9117	68.0802	48.5605
PS	36	4	CPT2, Pyk	32.3009	67.8534	46.9213
PS	36	5	CPT2, Pyk	21.1305	48.6706	27.7031
PS	36	6	CPT2, Pyk	36.8044	81.6413	51.0622
PS	38	3	CPT2, Pyk	7.95681	8.83035	8.66259
PS	34	0	Mtpα, Pyk	2.40051	3.21343	3.26645
PS	34	1	Mtpα, Pyk	9.88049	13.0639	11.8407
PS	34	2	Mtpα, Pyk	5.87431	10.4253	8.13853
PS	34	3	Mtpα, Pyk	9.60596	12.3488	11.8759
PS	34	4	Mtpα, Pyk	0	0	0
PS	36	1	Mtpα, Pyk	29.1512	35.4031	33.1431
PS	36	2	Mtpα, Pyk	66.093	88.0847	83.5645
PS	36	3	Mtpα, Pyk	81.6999	95.3531	91.4296
PS	36	4	Mtpα, Pyk	66.3839	82.2285	79.0834
PS	36	5	Mtpα, Pyk	52.4481	51.2125	58.1583
PS	36	6	Mtpα, Pyk	107.163	129.604	119.727
PS	38	3	Mtpα, Pyk	7.06069	9.84006	7.32518
PS	34	0	CPT2, cherry	3.01174	4.02935	2.89446
PS	34	1	CPT2, cherry	11.4601	16.4026	12.7009
PS	34	2	CPT2, cherry	9.58983	10.3953	11.8658
PS	34	3	CPT2, cherry	12.3761	15.5408	14.3824
PS	34	4	CPT2, cherry	4.02985	0	0
PS	36	1	CPT2, cherry	31.0053	39.3483	30.8692
PS	36	2	CPT2, cherry	91.9723	117.814	101.354
PS	36	3	CPT2, cherry	116.358	144.089	126.076
PS	36	4	CPT2, cherry	93.4261	115.812	100.521
PS	36	5	CPT2, cherry	72.8436	79.2713	78.9608
PS	36	6	CPT2, cherry	142.99	179.122	163.208
PS	38	3	CPT2, cherry	7.15682	10.5443	10.8128
PS	34	0	Mtpα, cherry	1.89843	2.34825	1.92405
PS	34	1	Mtpα, cherry	6.15319	7.64497	10.3843
PS	34	2	Mtpα, cherry	4.47963	4.53426	6.89908
PS	34	3	Mtpα, cherry	6.3887	9.92627	11.7489
PS	34	4	Mtpα, cherry	0	0	0
PS	36	1	Mtpα, cherry	20.4022	24.9711	35.0069
PS	36	2	Mtpα, cherry	50.7403	62.1379	92.5758
PS	36	3	Mtpα, cherry	69.814	79.029	117.694
PS	36	4	Mtpα, cherry	50.0516	66.8602	88.9022
PS	36	5	Mtpα, cherry	41.2141	43.413	62.0066
PS	36	6	Mtpα, cherry	77.8895	99.4328	137.299
PS	38	3	Mtpα, cherry	10.3533	7.84475	9.73834
PE	30	1	GFP, cherry	0	0	0
PE	32	0	GFP, cherry	0	2.74227	3.29145
PE	32	1	GFP, cherry	8.03569	9.80816	12.3977
PE	32	2	GFP, cherry	2.33135	4.58854	5.19187
PE	32	3	GFP, cherry	0	0	0
PE	34	0	GFP, cherry	8.60946	0	11.7284
PE	34	1	GFP, cherry	98.3909	127.74	137.173
PE	34	2	GFP, cherry	55.2594	59.9522	73.936
PE	34	3	GFP, cherry	93.3691	113.688	123.095
PE	34	4	GFP, cherry	4.64398	5.90123	6.82735
PE	36	1	GFP, cherry	112.455	141.606	149.654
PE	36	2	GFP, cherry	209.009	229.886	270.661
PE	36	3	GFP, cherry	617.784	731.46	801.461
PE	36	4	GFP, cherry	117.384	138.02	157.512
PE	36	5	GFP, cherry	57.4622	65.6362	76.0165
PE	36	6	GFP, cherry	23.3701	34.2329	34.0546
PE	38	1	GFP, cherry	0	2.49276	3.9056
PE	38	2	GFP, cherry	2.99616	3.3428	6.24227
PE	38	3	GFP, cherry	7.11892	8.84974	10.6566
PE	30	1	Pyk, cherry	0	0	0
PE	32	0	Pyk, cherry	3.30247	2.81327	2.90233
PE	32	1	Pyk, cherry	17.3223	12.7175	17.5646
PE	32	2	Pyk, cherry	7.75711	5.87776	5.85268
PE	32	3	Pyk, cherry	0	0	0
PE	34	0	Pyk, cherry	0	0	0
PE	34	1	Pyk, cherry	150.563	114.189	148.016
PE	34	2	Pyk, cherry	81.243	62.0755	79.2176
PE	34	3	Pyk, cherry	111.077	90.0657	106.81
PE	34	4	Pyk, cherry	7.76413	5.98912	7.93945
PE	36	1	Pyk, cherry	170.348	133.738	176.484
PE	36	2	Pyk, cherry	266.14	196.938	273.387
PE	36	3	Pyk, cherry	614.689	500.8	651.217
PE	36	4	Pyk, cherry	135.689	109.131	141.87
PE	36	5	Pyk, cherry	56.012	44.0799	56.8065
PE	36	6	Pyk, cherry	23.8274	19.9032	23.817
PE	38	1	Pyk, cherry	5.35585	4.02752	5.68528
PE	38	2	Pyk, cherry	4.1377	2.47747	5.45804
PE	38	3	Pyk, cherry	8.9742	6.90766	8.79175
PE	30	1	CPT2, Pyk	0	5.45352	3.96982
PE	32	0	CPT2, Pyk	0	2.73187	0
PE	32	1	CPT2, Pyk	13.8746	27.6139	20.9668
PE	32	2	CPT2, Pyk	4.12244	10.3084	8.62885
PE	32	3	CPT2, Pyk	0	0	0
PE	34	0	CPT2, Pyk	0	0	0
PE	34	1	CPT2, Pyk	69.5228	141.733	104.869
PE	34	2	CPT2, Pyk	34.2235	71.5103	55.4491
PE	34	3	CPT2, Pyk	38.8851	78.8369	64.0898
PE	34	4	CPT2, Pyk	4.18218	7.18385	6.12695
PE	36	1	CPT2, Pyk	62.571	123.845	86.642
PE	36	2	CPT2, Pyk	105.169	217.933	147.817
PE	36	3	CPT2, Pyk	237.811	451.611	334.97
PE	36	4	CPT2, Pyk	60.4974	119.317	84.8705
PE	36	5	CPT2, Pyk	25.7555	43.3787	31.705
PE	36	6	CPT2, Pyk	9.3984	17.6597	14.3705
PE	38	1	CPT2, Pyk	2.52178	6.7903	4.08842
PE	38	2	CPT2, Pyk	2.73058	5.36508	2.61902
PE	38	3	CPT2, Pyk	4.209	7.37714	6.11502
PE	30	1	Mtpα, Pyk	0	9.159	5.23257
PE	32	0	Mtpα, Pyk	3.10806	2.76281	3.02733
PE	32	1	Mtpα, Pyk	14.1186	34.7999	33.1954
PE	32	2	Mtpα, Pyk	4.92336	13.0928	11.0632
PE	32	3	Mtpα, Pyk	0	2.41343	0
PE	34	0	Mtpα, Pyk	9.89654	0	0
PE	34	1	Mtpα, Pyk	130.565	133.441	150.517
PE	34	2	Mtpα, Pyk	70.4279	76.277	89.1695
PE	34	3	Mtpα, Pyk	99.245	93.7331	110.58
PE	34	4	Mtpα, Pyk	7.0524	10.6338	9.27623
PE	36	1	Mtpα, Pyk	157.992	139.071	152.381
PE	36	2	Mtpα, Pyk	246.768	200.734	248.121
PE	36	3	Mtpα, Pyk	617.578	510.254	582.708
PE	36	4	Mtpα, Pyk	142.372	126.887	134.332
PE	36	5	Mtpα, Pyk	63.3076	52.142	54.7567
PE	36	6	Mtpα, Pyk	25.8482	27.8386	22.12
PE	38	1	Mtpα, Pyk	7.14085	5.26499	4.59787
PE	38	2	Mtpα, Pyk	7.30989	4.79239	4.61386
PE	38	3	Mtpα, Pyk	10.2319	7.87336	8.56126
PE	30	1	CPT2, cherry	4.05163	4.00978	3.29975
PE	32	0	CPT2, cherry	2.86649	4.12268	3.75698
PE	32	1	CPT2, cherry	20.9239	22.2044	21.414
PE	32	2	CPT2, cherry	8.07256	10.5201	10.0069
PE	32	3	CPT2, cherry	0	0	0
PE	34	0	CPT2, cherry	0	0	0
PE	34	1	CPT2, cherry	154.722	177.935	179.095
PE	34	2	CPT2, cherry	89.4416	90.5556	106.424
PE	34	3	CPT2, cherry	111.944	134.114	134.001
PE	34	4	CPT2, cherry	7.56929	8.02927	8.30178
PE	36	1	CPT2, cherry	151.473	179.27	173.201
PE	36	2	CPT2, cherry	304.09	315.17	358.316
PE	36	3	CPT2, cherry	696.514	803.983	832.198
PE	36	4	CPT2, cherry	144.856	159.884	177.783
PE	36	5	CPT2, cherry	62.7167	76.6533	77.2354
PE	36	6	CPT2, cherry	27.3399	33.8026	33.3673
PE	38	1	CPT2, cherry	4.30419	5.12148	4.95345
PE	38	2	CPT2, cherry	5.5887	5.66212	5.14305
PE	38	3	CPT2, cherry	8.27371	11.3315	11.4097
PE	30	1	Mtpα, cherry	1.79091	0	0
PE	32	0	Mtpα, cherry	0	0	3.16435
PE	32	1	Mtpα, cherry	11.9214	12.5192	13.9996
PE	32	2	Mtpα, cherry	3.42725	5.24917	5.49858
PE	32	3	Mtpα, cherry	0	0	0
PE	34	0	Mtpα, cherry	0	0	0
PE	34	1	Mtpα, cherry	92.3098	125.311	157.644
PE	34	2	Mtpα, cherry	52.7512	61.6349	74.933
PE	34	3	Mtpα, cherry	72.3928	90.2872	111.167
PE	34	4	Mtpα, cherry	3.04026	5.66562	5.77869
PE	36	1	Mtpα, cherry	103.397	134.848	161.087
PE	36	2	Mtpα, cherry	189.18	212.353	278.376
PE	36	3	Mtpα, cherry	471.128	597.751	764.228
PE	36	4	Mtpα, cherry	94.9541	117.113	152.201
PE	36	5	Mtpα, cherry	46.8974	54.0045	75.0676
PE	36	6	Mtpα, cherry	17.591	25.8487	31.9536
PE	38	1	Mtpα, cherry	2.28114	3.84767	3.68634
PE	38	2	Mtpα, cherry	2.90498	5.32679	3.8045
PE	38	3	Mtpα, cherry	5.46737	7.95146	9.13076
PC	30	0	GFP, cherry	0	0	0
PC	30	1	GFP, cherry	1.86328	3.77146	3.81199
PC	32	0	GFP, cherry	20.449	25.8205	25.7405
PC	32	1	GFP, cherry	27.0494	39.2887	37.4011
PC	32	2	GFP, cherry	7.19837	11.5117	13.008
PC	32	3	GFP, cherry	0	6.24887	6.3292
PC	32	4	GFP, cherry	0	0	0
PC	34	1	GFP, cherry	95.7523	129.516	118.842
PC	34	2	GFP, cherry	79.8028	98.0656	100.763
PC	34	3	GFP, cherry	57.3197	74.2703	74.8554
PC	34	4	GFP, cherry	10.4498	16.4707	16.8237
PC	36	1	GFP, cherry	33.8351	47.0618	43.4248
PC	36	2	GFP, cherry	75.174	98.618	93.5833
PC	36	3	GFP, cherry	131.241	159.686	156.489
PC	36	4	GFP, cherry	85.6421	116.652	108.291
PC	36	5	GFP, cherry	36.5053	44.9715	48.2504
PC	36	6	GFP, cherry	14.9001	21.2718	21.0363
PC	30	0	Pyk, cherry	0	0	0
PC	30	1	Pyk, cherry	5.21726	4.51889	5.16923
PC	32	0	Pyk, cherry	26.3949	21.6028	25.3598
PC	32	1	Pyk, cherry	46.6458	37.9394	47.3961
PC	32	2	Pyk, cherry	15.4979	12.6238	15.2447
PC	32	3	Pyk, cherry	4.64059	4.65532	5.67838
PC	32	4	Pyk, cherry	0	0	0
PC	34	1	Pyk, cherry	143.846	112.948	135.339
PC	34	2	Pyk, cherry	95.034	77.3259	95.7786
PC	34	3	Pyk, cherry	57.5033	46.6346	55.3882
PC	34	4	Pyk, cherry	13.822	11.0411	14.422
PC	36	1	Pyk, cherry	48.01	40.1619	48.5134
PC	36	2	Pyk, cherry	97.428	75.7806	94.4888
PC	36	3	Pyk, cherry	135.794	113.528	136.041
PC	36	4	Pyk, cherry	92.2666	75.2223	93.3652
PC	36	5	Pyk, cherry	30.8027	24.7306	30.7304
PC	36	6	Pyk, cherry	0	0	0
PC	30	0	CPT2, Pyk	0	0	0
PC	30	1	CPT2, Pyk	3.82304	9.4916	7.65793
PC	32	0	CPT2, Pyk	10.4841	18.5721	15.3319
PC	32	1	CPT2, Pyk	25.8245	50.9274	38.5101
PC	32	2	CPT2, Pyk	10.7875	25.2433	17.2779
PC	32	3	CPT2, Pyk	2.89905	6.89566	4.59831
PC	32	4	CPT2, Pyk	0	0	0
PC	34	1	CPT2, Pyk	66.3253	128.269	89.2573
PC	34	2	CPT2, Pyk	55.2935	106.434	72.3381
PC	34	3	CPT2, Pyk	32.6851	61.036	42.401
PC	34	4	CPT2, Pyk	9.88415	19.9589	14.7273
PC	36	1	CPT2, Pyk	17.4819	32.0111	22.7818
PC	36	2	CPT2, Pyk	54.1647	99.4031	65.4519
PC	36	3	CPT2, Pyk	92.5566	149.706	103.688
PC	36	4	CPT2, Pyk	54.5965	101.029	69.4004
PC	36	5	CPT2, Pyk	19.5413	37.1754	24.355
PC	36	6	CPT2, Pyk	0	0	0
PC	30	0	Mtpα, Pyk	0	0	0
PC	30	1	Mtpα, Pyk	3.20621	6.77698	6.15614
PC	32	0	Mtpα, Pyk	20.2605	19.6185	22.6528
PC	32	1	Mtpα, Pyk	32.1582	42.9467	44.2853
PC	32	2	Mtpα, Pyk	11.1338	16.9384	15.818
PC	32	3	Mtpα, Pyk	3.96971	5.01262	4.3566
PC	32	4	Mtpα, Pyk	0	0	0
PC	34	1	Mtpα, Pyk	112.64	120.743	133.824
PC	34	2	Mtpα, Pyk	82.7956	78.6789	98.6294
PC	34	3	Mtpα, Pyk	47.8342	48.2737	58.0125
PC	34	4	Mtpα, Pyk	13.2404	15.9666	14.2143
PC	36	1	Mtpα, Pyk	40.3668	38.0958	43.6537
PC	36	2	Mtpα, Pyk	86.0793	82.6768	96.0595
PC	36	3	Mtpα, Pyk	117.255	104.817	126.016
PC	36	4	Mtpα, Pyk	73.906	68.1457	84.1078
PC	36	5	Mtpα, Pyk	28.3379	23.7937	30.6627
PC	36	6	Mtpα, Pyk	0	0	0
PC	30	0	CPT2, cherry	0	11.5484	0
PC	30	1	CPT2, cherry	6.28219	7.31292	7.81698
PC	32	0	CPT2, cherry	27.7666	34.3777	31.6235
PC	32	1	CPT2, cherry	50.2721	53.9564	58.9174
PC	32	2	CPT2, cherry	18.0275	20.5801	22.8599
PC	32	3	CPT2, cherry	5.57969	7.02202	7.40479
PC	32	4	CPT2, cherry	1.31897	0	0
PC	34	1	CPT2, cherry	143.231	162.288	173.159
PC	34	2	CPT2, cherry	110.549	120.897	133.325
PC	34	3	CPT2, cherry	66.2571	83.451	81.2986
PC	34	4	CPT2, cherry	15.7716	17.6518	20.4431
PC	36	1	CPT2, cherry	51.8716	59.2929	57.7574
PC	36	2	CPT2, cherry	104.474	116.784	123.698
PC	36	3	CPT2, cherry	154.577	179.55	183.182
PC	36	4	CPT2, cherry	102.984	127.292	133.22
PC	36	5	CPT2, cherry	39.1671	47.835	49.1509
PC	36	6	CPT2, cherry	0	0	0
PC	30	0	Mtpα, cherry	0	0	0
PC	30	1	Mtpα, cherry	2.79936	4.26257	3.61939
PC	32	0	Mtpα, cherry	19.4878	22.8163	28.1187
PC	32	1	Mtpα, cherry	25.6599	33.5106	36.4817
PC	32	2	Mtpα, cherry	9.29408	11.5818	13.171
PC	32	3	Mtpα, cherry	2.77572	4.59085	4.96647
PC	32	4	Mtpα, cherry	0	0	0
PC	34	1	Mtpα, cherry	88.5685	117.388	129.496
PC	34	2	Mtpα, cherry	74.3715	82.4719	105.117
PC	34	3	Mtpα, cherry	49.3488	60.9552	80.7345
PC	34	4	Mtpα, cherry	8.49726	13.2386	12.6022
PC	36	1	Mtpα, cherry	33.7999	43.4551	51.6122
PC	36	2	Mtpα, cherry	69.8194	81.5012	101.559
PC	36	3	Mtpα, cherry	115.643	131.315	169.277
PC	36	4	Mtpα, cherry	72.9524	90.8603	117.62
PC	36	5	Mtpα, cherry	28.5405	31.919	48.2737
PC	36	6	Mtpα, cherry	0	0	20.3492

## Sheet: TAG
species	carbons	n saturation	genotype	sample	sample 2	sample 3
TAG	34	0	GFP, cherry	1.15263	3.3689	3.65334
TAG	36	0	GFP, cherry	5.13205	7.49293	10.5485
TAG	36	1	GFP, cherry	0	0	0
TAG	37	0	GFP, cherry	0	0	0
TAG	38	0	GFP, cherry	17.9638	21.7115	35.2926
TAG	38	1	GFP, cherry	0	2.12087	3.34684
TAG	39	0	GFP, cherry	0	0	1.0526
TAG	39	1	GFP, cherry	0	0	0
TAG	40	0	GFP, cherry	24.4758	27.7843	48.1101
TAG	40	1	GFP, cherry	5.11748	5.63095	10.2511
TAG	40	2	GFP, cherry	0	0	0
TAG	41	0	GFP, cherry	0.680394	0	1.77981
TAG	41	1	GFP, cherry	0	0	0
TAG	42	0	GFP, cherry	11.513	13.8458	24.3836
TAG	42	1	GFP, cherry	12.4232	13.5881	26.8333
TAG	42	2	GFP, cherry	1.263	1.03722	2.26304
TAG	43	0	GFP, cherry	0	0	1.10597
TAG	43	1	GFP, cherry	0.702624	0	0
TAG	44	0	GFP, cherry	2.89553	3.57452	6.04625
TAG	44	1	GFP, cherry	17.7854	19.4268	36.4557
TAG	44	2	GFP, cherry	4.88143	3.95232	9.7088
TAG	44	3	GFP, cherry	0	0	0
TAG	45	0	GFP, cherry	0	0	0
TAG	45	1	GFP, cherry	0.897907	0	1.88658
TAG	45	2	GFP, cherry	0	0	0
TAG	46	0	GFP, cherry	0	0	0
TAG	46	1	GFP, cherry	14.3085	14.8151	29.0931
TAG	46	2	GFP, cherry	7.71668	6.424	14.7852
TAG	46	3	GFP, cherry	1.61239	0	3.30323
TAG	47	1	GFP, cherry	0	1.14511	1.76889
TAG	47	2	GFP, cherry	0	0	0
TAG	48	0	GFP, cherry	0	0	1.15259
TAG	48	1	GFP, cherry	5.9106	5.62829	12.3211
TAG	48	2	GFP, cherry	5.25078	4.63489	11.4879
TAG	48	3	GFP, cherry	2.51485	1.8049	4.73491
TAG	48	4	GFP, cherry	0	0	0
TAG	49	1	GFP, cherry	0	0	1.3102
TAG	49	2	GFP, cherry	0	0	0
TAG	50	1	GFP, cherry	0	0	0
TAG	50	2	GFP, cherry	0	0	4.93937
TAG	50	3	GFP, cherry	1.63805	1.95375	3.09108
TAG	50	4	GFP, cherry	0	0	0.952508
TAG	50	5	GFP, cherry	0	0	0
TAG	52	0	GFP, cherry	0	0	0
TAG	52	1	GFP, cherry	0	0	0
TAG	52	2	GFP, cherry	0	0	0
TAG	52	3	GFP, cherry	0	0	0
TAG	52	5	GFP, cherry	0	0	0
TAG	54	3	GFP, cherry	0	3.66645	6.0038
TAG	54	4	GFP, cherry	0	2.63661	3.70465
TAG	54	5	GFP, cherry	0	1.69501	2.0325
TAG	54	6	GFP, cherry	0	0	0
TAG	54	7	GFP, cherry	0	0	0
TAG	56	1	GFP, cherry	0	0	0
TAG	56	3	GFP, cherry	0	0	0
TAG	34	0	PyK, cherry	2.57961	4.23116	4.94082
TAG	36	0	PyK, cherry	33.2597	36.6821	43.5233
TAG	36	1	PyK, cherry	1.20543	1.47826	1.85797
TAG	37	0	PyK, cherry	1.68282	1.47565	2.21508
TAG	38	0	PyK, cherry	109.881	123.053	171.185
TAG	38	1	PyK, cherry	11.7815	13.3215	16.676
TAG	39	0	PyK, cherry	3.84987	3.46628	5.38644
TAG	39	1	PyK, cherry	0.859743	0	1.26338
TAG	40	0	PyK, cherry	106.34	118.88	227.617
TAG	40	1	PyK, cherry	33.6003	33.683	54.0301
TAG	40	2	PyK, cherry	2.50463	2.60799	3.30423
TAG	41	0	PyK, cherry	3.94	3.1935	6.0028
TAG	41	1	PyK, cherry	1.63685	1.47289	2.60099
TAG	42	0	PyK, cherry	43.6438	45.4066	116.208
TAG	42	1	PyK, cherry	67.1715	59.1223	117.342
TAG	42	2	PyK, cherry	7.45856	7.12981	10.7165
TAG	43	0	PyK, cherry	1.84956	1.58689	3.18311
TAG	43	1	PyK, cherry	3.02336	2.43011	3.93675
TAG	44	0	PyK, cherry	8.122	9.86854	23.8096
TAG	44	1	PyK, cherry	79.4223	68.425	143.209
TAG	44	2	PyK, cherry	25.0261	21.4585	36.5726
TAG	44	3	PyK, cherry	0	0	2.96812
TAG	45	0	PyK, cherry	0	0	0
TAG	45	1	PyK, cherry	3.57094	2.48327	4.27205
TAG	45	2	PyK, cherry	1.47339	0.989246	1.40837
TAG	46	0	PyK, cherry	0	0	0
TAG	46	1	PyK, cherry	50.0563	43.7073	100.265
TAG	46	2	PyK, cherry	31.5005	27.1297	55.0171
TAG	46	3	PyK, cherry	7.72662	7.07534	8.8485
TAG	47	1	PyK, cherry	2.47718	1.51578	3.07199
TAG	47	2	PyK, cherry	1.57465	1.12565	2.06512
TAG	48	0	PyK, cherry	0	0	0
TAG	48	1	PyK, cherry	16.5201	15.275	34.5184
TAG	48	2	PyK, cherry	17.1171	15.5457	31.5383
TAG	48	3	PyK, cherry	8.10815	7.53781	11.3643
TAG	48	4	PyK, cherry	1.74596	1.55941	2.003
TAG	49	1	PyK, cherry	0	0	1.5381
TAG	49	2	PyK, cherry	1.03405	0	1.38726
TAG	50	1	PyK, cherry	0	0	7.96736
TAG	50	2	PyK, cherry	6.07246	5.19654	10.6612
TAG	50	3	PyK, cherry	3.95364	3.65734	5.75535
TAG	50	4	PyK, cherry	2.11876	1.62169	2.55985
TAG	50	5	PyK, cherry	0	0	0
TAG	52	0	PyK, cherry	0	0	0
TAG	52	1	PyK, cherry	0	0	0
TAG	52	2	PyK, cherry	0	0	10.9221
TAG	52	3	PyK, cherry	0	0	7.8959
TAG	52	5	PyK, cherry	1.17514	0	1.56209
TAG	54	3	PyK, cherry	0	0	42.0797
TAG	54	4	PyK, cherry	0	0	25.1417
TAG	54	5	PyK, cherry	2.68657	0	10.8573
TAG	54	6	PyK, cherry	1.75195	0	5.29389
TAG	54	7	PyK, cherry	0	0	1.42692
TAG	56	1	PyK, cherry	0	0	5.22987
TAG	56	3	PyK, cherry	0	0	2.08036
TAG	34	0	CPT2, PyK	3.97494	4.44593	3.53081
TAG	36	0	CPT2, PyK	7.23805	28.6885	28.8015
TAG	36	1	CPT2, PyK	0	1.31562	1.5002
TAG	37	0	CPT2, PyK	0	1.43906	1.91424
TAG	38	0	CPT2, PyK	17.5216	92.157	89.3053
TAG	38	1	CPT2, PyK	0	10.5218	10.0538
TAG	39	0	CPT2, PyK	0.685513	3.58792	3.97815
TAG	39	1	CPT2, PyK	0	1.02135	0.921181
TAG	40	0	CPT2, PyK	19.7002	77.3962	86.9975
TAG	40	1	CPT2, PyK	4.05584	24.6229	26.6554
TAG	40	2	CPT2, PyK	0	1.55149	1.9739
TAG	41	0	CPT2, PyK	0.996611	2.99072	3.66389
TAG	41	1	CPT2, PyK	0	0	1.79084
TAG	42	0	CPT2, PyK	10.0603	31.1687	35.6109
TAG	42	1	CPT2, PyK	9.72533	52.8987	51.9049
TAG	42	2	CPT2, PyK	0.858349	6.14408	5.527
TAG	43	0	CPT2, PyK	0	1.23238	1.82693
TAG	43	1	CPT2, PyK	0.786713	2.54233	2.78082
TAG	44	0	CPT2, PyK	2.15535	7.08604	7.62544
TAG	44	1	CPT2, PyK	12.4924	62.2137	60.2729
TAG	44	2	CPT2, PyK	3.22329	18.5278	16.1921
TAG	44	3	CPT2, PyK	0	0	0
TAG	45	0	CPT2, PyK	0	0	0.967829
TAG	45	1	CPT2, PyK	0.918402	2.92467	2.92839
TAG	45	2	CPT2, PyK	0	0	1.10791
TAG	46	0	CPT2, PyK	0	0	0
TAG	46	1	CPT2, PyK	10.5211	42.2798	39.8786
TAG	46	2	CPT2, PyK	4.76259	23.1879	22.6817
TAG	46	3	CPT2, PyK	1.12021	5.45193	4.61766
TAG	47	1	CPT2, PyK	0	2.20247	2.42612
TAG	47	2	CPT2, PyK	0	1.18732	1.34683
TAG	48	0	CPT2, PyK	0	0	0
TAG	48	1	CPT2, PyK	4.50052	17.1053	14.1977
TAG	48	2	CPT2, PyK	4.03834	16.3117	13.3279
TAG	48	3	CPT2, PyK	2.02481	7.96412	5.80936
TAG	48	4	CPT2, PyK	0	2.13761	0
TAG	49	1	CPT2, PyK	0	0	1.13824
TAG	49	2	CPT2, PyK	0	0	0.934463
TAG	50	1	CPT2, PyK	0	4.79439	0
TAG	50	2	CPT2, PyK	0	9.16696	5.61398
TAG	50	3	CPT2, PyK	2.02765	6.03767	3.98505
TAG	50	4	CPT2, PyK	1.03785	3.61295	2.16209
TAG	50	5	CPT2, PyK	0	0	0
TAG	52	0	CPT2, PyK	0	0	0
TAG	52	1	CPT2, PyK	0	0	0
TAG	52	2	CPT2, PyK	0	0	0
TAG	52	3	CPT2, PyK	0	6.59888	0
TAG	52	5	CPT2, PyK	0	1.94341	1.0451
TAG	54	3	CPT2, PyK	0	22.9898	11.0852
TAG	54	4	CPT2, PyK	0	15.6711	6.63769
TAG	54	5	CPT2, PyK	1.40409	7.77832	3.80099
TAG	54	6	CPT2, PyK	1.59068	3.6376	1.61951
TAG	54	7	CPT2, PyK	0	0	0
TAG	56	1	CPT2, PyK	0	0	0
TAG	56	3	CPT2, PyK	0	1.5553	0
TAG	34	0	Mtpα, PyK	3.69579	3.77027	4.77607
TAG	36	0	Mtpα, PyK	19.5181	47.5899	51.3202
TAG	36	1	Mtpα, PyK	0	1.57265	2.03675
TAG	37	0	Mtpα, PyK	0	2.22674	2.35944
TAG	38	0	Mtpα, PyK	64.0423	166.618	178.68
TAG	38	1	Mtpα, PyK	5.81474	14.1626	17.36
TAG	39	0	Mtpα, PyK	1.78315	5.5869	5.52184
TAG	39	1	Mtpα, PyK	0	1.21886	0.923175
TAG	40	0	Mtpα, PyK	69.408	173.741	185.156
TAG	40	1	Mtpα, PyK	14.6607	40.6139	46.3082
TAG	40	2	Mtpα, PyK	1.13893	2.02313	2.92463
TAG	41	0	Mtpα, PyK	1.49603	4.70106	4.95637
TAG	41	1	Mtpα, PyK	0	2.19794	2.06118
TAG	42	0	Mtpα, PyK	30.5903	71.16	77.9006
TAG	42	1	Mtpα, PyK	27.6797	79.1528	90.0563
TAG	42	2	Mtpα, PyK	3.11695	7.30217	9.77449
TAG	43	0	Mtpα, PyK	0	2.40885	2.80785
TAG	43	1	Mtpα, PyK	0	3.41573	3.82761
TAG	44	0	Mtpα, PyK	7.30632	14.7359	16.4405
TAG	44	1	Mtpα, PyK	39.1273	94.662	110.093
TAG	44	2	Mtpα, PyK	10.5649	22.1629	30.0518
TAG	44	3	Mtpα, PyK	0	0	0
TAG	45	0	Mtpα, PyK	0	0	0
TAG	45	1	Mtpα, PyK	0	2.9195	4.00295
TAG	45	2	Mtpα, PyK	0	0	1.20595
TAG	46	0	Mtpα, PyK	0	2.63178	0
TAG	46	1	Mtpα, PyK	31.7014	65.8212	77.4502
TAG	46	2	Mtpα, PyK	17.0098	28.9587	42.891
TAG	46	3	Mtpα, PyK	4.58919	4.71727	9.18776
TAG	47	1	Mtpα, PyK	0	2.56864	2.81411
TAG	47	2	Mtpα, PyK	0	1.08874	1.61072
TAG	48	0	Mtpα, PyK	0	0	0
TAG	48	1	Mtpα, PyK	13.8447	25.681	26.7804
TAG	48	2	Mtpα, PyK	13.0191	18.1433	24.56
TAG	48	3	Mtpα, PyK	5.95092	5.83457	9.88427
TAG	48	4	Mtpα, PyK	1.10113	0	2.27899
TAG	49	1	Mtpα, PyK	0	1.01205	1.21009
TAG	49	2	Mtpα, PyK	0	0	1.44083
TAG	50	1	Mtpα, PyK	0	5.92817	5.75969
TAG	50	2	Mtpα, PyK	5.16093	6.88812	7.36466
TAG	50	3	Mtpα, PyK	3.79232	3.21758	4.78777
TAG	50	4	Mtpα, PyK	1.56752	1.49604	2.23057
TAG	50	5	Mtpα, PyK	0	0	0
TAG	52	0	Mtpα, PyK	0	0	0
TAG	52	1	Mtpα, PyK	0	0	1.19457
TAG	52	2	Mtpα, PyK	0	0	0
TAG	52	3	Mtpα, PyK	0	0	0
TAG	52	5	Mtpα, PyK	0	0	0
TAG	54	3	Mtpα, PyK	0	0	0
TAG	54	4	Mtpα, PyK	0	0	0
TAG	54	5	Mtpα, PyK	2.61672	0	0
TAG	54	6	Mtpα, PyK	2.84469	0	0
TAG	54	7	Mtpα, PyK	1.26614	0	0
TAG	56	1	Mtpα, PyK	0	0	0
TAG	56	3	Mtpα, PyK	0	0	0
	34	0	CPT2, cherry	2.20379	8.98115	2.40414
	36	0	CPT2, cherry	41.1998	42.1816	34.2123
	36	1	CPT2, cherry	1.24486	1.52554	1.28923
	37	0	CPT2, cherry	2.62223	1.93808	2.10364
	38	0	CPT2, cherry	165.074	155.501	146.671
	38	1	CPT2, cherry	15.7788	15.0851	14.5175
	39	0	CPT2, cherry	6.10314	4.90644	6.09355
	39	1	CPT2, cherry	1.40542	1.10834	1.05694
	40	0	CPT2, cherry	189.39	199.014	193.652
	40	1	CPT2, cherry	48.4593	44.8839	50.0499
	40	2	CPT2, cherry	3.12812	3.08454	2.80803
	41	0	CPT2, cherry	6.17105	5.96816	7.06732
	41	1	CPT2, cherry	2.8241	2.36056	2.96394
	42	0	CPT2, cherry	84.5243	92.6656	96.8661
	42	1	CPT2, cherry	106.601	96.5339	115.394
	42	2	CPT2, cherry	9.42919	8.91788	10.7022
	43	0	CPT2, cherry	3.41362	2.85945	3.42244
	43	1	CPT2, cherry	5.03276	3.79475	4.87081
	44	0	CPT2, cherry	16.7717	20.1794	20.6649
	44	1	CPT2, cherry	129.248	126.379	150.988
	44	2	CPT2, cherry	34.5641	31.7482	35.6654
	44	3	CPT2, cherry	0	0	3.36734
	45	0	CPT2, cherry	1.08479	1.39531	0
	45	1	CPT2, cherry	5.79469	4.49851	5.9937
	45	2	CPT2, cherry	1.95922	1.8057	2.09846
	46	0	CPT2, cherry	3.06901	0	0
	46	1	CPT2, cherry	87.6585	91.3764	102.586
	46	2	CPT2, cherry	49.1445	47.6931	58.1748
	46	3	CPT2, cherry	8.91631	9.62672	11.6426
	47	1	CPT2, cherry	3.58225	3.10025	3.79374
	47	2	CPT2, cherry	2.43269	2.08571	2.35821
	48	0	CPT2, cherry	1.4948	0	0
	48	1	CPT2, cherry	30.1136	30.9489	34.1962
	48	2	CPT2, cherry	29.5447	29.5055	36.651
	48	3	CPT2, cherry	12.2246	12.8932	17.5376
	48	4	CPT2, cherry	2.77417	3.02397	4.29815
	49	1	CPT2, cherry	1.58666	0	1.58107
	49	2	CPT2, cherry	1.42267	1.4884	1.36744
	50	1	CPT2, cherry	6.79133	6.86202	7.54717
	50	2	CPT2, cherry	10.8507	9.04976	12.7786
	50	3	CPT2, cherry	7.31659	7.70693	10.2231
	50	4	CPT2, cherry	3.83584	3.44833	6.20065
	50	5	CPT2, cherry	0	0	1.57845
	52	0	CPT2, cherry	1.68889	0	0
	52	1	CPT2, cherry	1.69357	1.50871	1.60851
	52	2	CPT2, cherry	0	0	0
	52	3	CPT2, cherry	0	0	0
	52	5	CPT2, cherry	1.58225	1.0866	2.26468
	54	3	CPT2, cherry	20.5203	0	0
	54	4	CPT2, cherry	13.6265	2.3664	0
	54	5	CPT2, cherry	6.43048	2.03001	1.59618
	54	6	CPT2, cherry	3.27763	1.09696	0
	54	7	CPT2, cherry	0	0	0
	56	1	CPT2, cherry	0	0	0
	56	3	CPT2, cherry	0	0	0
	34	0	MTPα, cherry	3.77155	7.26533	6.35826
	36	0	MTPα, cherry	12.5926	11.3716	23.8101
	36	1	MTPα, cherry	0	0	0.952938
	37	0	MTPα, cherry	0	0	1.23297
	38	0	MTPα, cherry	50.2618	31.8155	89.6784
	38	1	MTPα, cherry	3.43385	3.0629	7.64198
	39	0	MTPα, cherry	1.73429	1.25397	3.2982
	39	1	MTPα, cherry	0	0	0
	40	0	MTPα, cherry	73.0504	44.7711	113.089
	40	1	MTPα, cherry	12.1445	7.91275	24.8991
	40	2	MTPα, cherry	0.597327	0	1.90757
	41	0	MTPα, cherry	1.78003	1.41898	3.29838
	41	1	MTPα, cherry	0.597177	0	1.66413
	42	0	MTPα, cherry	38.0308	25.3831	56.2994
	42	1	MTPα, cherry	29.8801	19.7958	58.8579
	42	2	MTPα, cherry	2.34105	2.02163	5.62342
	43	0	MTPα, cherry	0.993102	1.1624	2.19129
	43	1	MTPα, cherry	1.43599	1.29099	2.36002
	44	0	MTPα, cherry	8.73155	6.78085	12.4213
	44	1	MTPα, cherry	42.0665	27.4252	81.1637
	44	2	MTPα, cherry	8.86141	6.71673	22.0059
	44	3	MTPα, cherry	0	0	0
	45	0	MTPα, cherry	0	0	0
	45	1	MTPα, cherry	1.45265	0	0
	45	2	MTPα, cherry	0	0	1.0697
	46	0	MTPα, cherry	0	2.43333	0
	46	1	MTPα, cherry	34.098	25.4583	63.6169
	46	2	MTPα, cherry	15.0141	12.2605	34.2839
	46	3	MTPα, cherry	2.69485	1.92561	7.12707
	47	1	MTPα, cherry	1.24214	1.27334	0
	47	2	MTPα, cherry	0	0	1.55076
	48	0	MTPα, cherry	0	1.53419	0
	48	1	MTPα, cherry	13.5301	12.5423	25.1897
	48	2	MTPα, cherry	10.8056	9.72618	21.2562
	48	3	MTPα, cherry	3.71711	3.60005	9.16532
	48	4	MTPα, cherry	0	0	1.44875
	49	1	MTPα, cherry	0	0	1.35877
	49	2	MTPα, cherry	0	0	1.077
	50	1	MTPα, cherry	0	0	4.82524
	50	2	MTPα, cherry	0	4.75827	7.77597
	50	3	MTPα, cherry	2.58982	2.8269	4.86297
	50	4	MTPα, cherry	1.1453	0	1.96352
	50	5	MTPα, cherry	0	0	0
	52	0	MTPα, cherry	0	0	0
	52	1	MTPα, cherry	0.812053	0	1.08119
	52	2	MTPα, cherry	0	0	0
	52	3	MTPα, cherry	0	0	0
	52	5	MTPα, cherry	0	0	0
	54	3	MTPα, cherry	0	0	0
	54	4	MTPα, cherry	0	0	0
	54	5	MTPα, cherry	0	0	1.62473
	54	6	MTPα, cherry	0	0	0
	54	7	MTPα, cherry	0	0	0
	56	1	MTPα, cherry	0	0	0
	56	3	MTPα, cherry	0	0	0
