# Supplementary material for: Glycolytically impaired Drosophila glial cells fuel neural metabolism via β-oxidation
Source: Nat Commun. 2023 May 24;14:2996. doi: 10.1038/s41467-023-38813-x (PMC10209077; doi:10.1038/s41467-023-38813-x)
Supplement: Supplementary file 6 — Supplementary data 3 [file 41467_2023_38813_MOESM6_ESM.xlsx]

## Sheet: PG
Head
species	carbons	n saturation	genotype	0.001	0.002	0.003
PG	30	1	GFP, cherry	0	0	0
PG	32	1	GFP, cherry	5.55508	4.58964	5.90894
PG	32	2	GFP, cherry	7.62002	5.5228	6.96269
PG	32	3	GFP, cherry	0	0	0
PG	34	0	GFP, cherry	0	0	1.35354
PG	34	1	GFP, cherry	5.2393	4.51471	4.75477
PG	34	2	GFP, cherry	15.8483	13.3352	15.484
PG	34	3	GFP, cherry	7.88637	5.92081	7.67725
PG	36	2	GFP, cherry	3.11603	2.1398	2.23376
PG	36	3	GFP, cherry	4.63661	3.69706	4.6857
PG	36	4	GFP, cherry	4.41875	3.572	4.5491
PG	36	5	GFP, cherry	0	0	0
PG	30	1	PyK, cherry	0	0	0
PG	32	1	PyK, cherry	5.19743	3.70721	4.64468
PG	32	2	PyK, cherry	7.07609	5.14978	5.94146
PG	32	3	PyK, cherry	2.69501	0	0
PG	34	0	PyK, cherry	0	0	0
PG	34	1	PyK, cherry	6.15665	3.62378	5.33919
PG	34	2	PyK, cherry	16.7753	9.81253	12.5432
PG	34	3	PyK, cherry	7.82011	3.5157	6.08099
PG	36	2	PyK, cherry	3.14536	1.67659	2.52147
PG	36	3	PyK, cherry	4.72917	2.48859	3.74744
PG	36	4	PyK, cherry	5.03177	2.92091	3.50861
PG	36	5	PyK, cherry	1.32647	0	0
PG	30	1	CPT2, PyK	0	0	1.68481
PG	32	1	CPT2, PyK	4.67491	5.24781	6.411
PG	32	2	CPT2, PyK	5.43767	5.87659	6.3147
PG	32	3	CPT2, PyK	0	0	0
PG	34	0	CPT2, PyK	1.27791	1.70766	1.67243
PG	34	1	CPT2, PyK	5.26234	5.58008	7.96672
PG	34	2	CPT2, PyK	13.8163	12.5868	12.7768
PG	34	3	CPT2, PyK	6.78518	6.22886	7.00212
PG	36	2	CPT2, PyK	3.27847	2.78528	4.48111
PG	36	3	CPT2, PyK	4.4404	3.95397	4.91353
PG	36	4	CPT2, PyK	4.59761	3.83004	4.66717
PG	36	5	CPT2, PyK	0	0	0
PG	30	1	MTPα, PyK	1.09807	0	0
PG	32	1	MTPα, PyK	5.24653	5.10539	4.46037
PG	32	2	MTPα, PyK	6.58787	4.9924	5.18146
PG	32	3	MTPα, PyK	2.68515	0	0
PG	34	0	MTPα, PyK	1.3493	0	1.07423
PG	34	1	MTPα, PyK	5.70622	3.65242	4.68936
PG	34	2	MTPα, PyK	16.1311	12.3373	11.4962
PG	34	3	MTPα, PyK	7.67844	6.44625	6.15809
PG	36	2	MTPα, PyK	3.38784	2.19911	2.5527
PG	36	3	MTPα, PyK	4.98065	3.99996	3.68942
PG	36	4	MTPα, PyK	4.43591	3.65835	3.83218
PG	36	5	MTPα, PyK	1.07685	0	0
PG	30	1	CPT2, cherry	0	0	0
PG	32	1	CPT2, cherry	4.86387	4.60515	5.22502
PG	32	2	CPT2, cherry	6.44919	6.11874	5.79575
PG	32	3	CPT2, cherry	0	0	0
PG	34	0	CPT2, cherry	0	1.26462	0
PG	34	1	CPT2, cherry	5.44729	3.37794	5.50255
PG	34	2	CPT2, cherry	15.744	11.5344	13.2694
PG	34	3	CPT2, cherry	6.66529	5.28237	6.46454
PG	36	2	CPT2, cherry	2.66089	2.46569	2.22388
PG	36	3	CPT2, cherry	3.81001	3.7213	3.80299
PG	36	4	CPT2, cherry	3.93552	3.08011	4.08833
PG	36	5	CPT2, cherry	0	0	0
PG	30	1	MTPα, cherry	0	0	0
PG	32	1	MTPα, cherry	5.33939	3.60875	6.61795
PG	32	2	MTPα, cherry	8.06645	5.07117	6.32055
PG	32	3	MTPα, cherry	0	0	0
PG	34	0	MTPα, cherry	0	1.0485	0
PG	34	1	MTPα, cherry	4.51871	3.1292	5.99605
PG	34	2	MTPα, cherry	17.024	12.0849	14.3725
PG	34	3	MTPα, cherry	7.63044	6.26957	6.68213
PG	36	2	MTPα, cherry	3.1533	0	2.89828
PG	36	3	MTPα, cherry	4.4583	3.00663	4.76797
PG	36	4	MTPα, cherry	4.24205	3.31205	4.57139
PG	36	5	MTPα, cherry	1.13439	0	0

## Sheet: TAG
Head
species	carbons	n saturation	genotype	sample 1	sample 2	sample 3
TAG	34	0	GFP, cherry	2.83942	5.49767	7.44112
TAG	36	0	GFP, cherry	134.417	273.618	264.335
TAG	36	1	GFP, cherry	5.03799	10.2214	10.076
TAG	38	0	GFP, cherry	602.335	1143.88	1186.51
TAG	38	1	GFP, cherry	63.4447	118.219	107.818
TAG	38	2	GFP, cherry	0	0	0
TAG	40	0	GFP, cherry	768.656	1263.54	1469.46
TAG	40	1	GFP, cherry	212.521	341.834	337.758
TAG	40	2	GFP, cherry	11.3259	21.8208	18.6948
TAG	42	0	GFP, cherry	358.19	527.426	696.234
TAG	42	1	GFP, cherry	517.625	749.237	834.717
TAG	42	2	GFP, cherry	45.09	73.0519	71.5715
TAG	42	3	GFP, cherry	0	3.72077	2.96563
TAG	44	0	GFP, cherry	100.416	121.538	168.152
TAG	44	1	GFP, cherry	693.826	975.538	1182.56
TAG	44	2	GFP, cherry	141.43	255.847	264.695
TAG	44	3	GFP, cherry	8.13231	26.4053	26.2763
TAG	46	0	GFP, cherry	0	0	0
TAG	46	1	GFP, cherry	486.436	653.671	857.775
TAG	46	2	GFP, cherry	201.507	347.67	393.213
TAG	46	3	GFP, cherry	23.031	71.7284	72.1768
TAG	46	4	GFP, cherry	1.64667	7.97512	7.45102
TAG	48	0	GFP, cherry	8.23911	3.74805	0
TAG	48	1	GFP, cherry	185.865	222.03	309.199
TAG	48	2	GFP, cherry	129.206	201.42	251.574
TAG	48	3	GFP, cherry	28.9042	70.8207	78.4615
TAG	48	4	GFP, cherry	3.7485	11.3051	11.3515
TAG	50	1	GFP, cherry	42.1662	41.7512	58.4924
TAG	50	2	GFP, cherry	45.0412	58.2806	77.4581
TAG	50	3	GFP, cherry	15.3426	32.2712	36.2384
TAG	50	4	GFP, cherry	4.25	9.77255	10.634
TAG	50	5	GFP, cherry	0	0	0
TAG	52	1	GFP, cherry	12.8077	9.39113	11.6134
TAG	52	2	GFP, cherry	0	11.7031	15.3981
TAG	52	3	GFP, cherry	0	8.2527	11.4185
TAG	52	4	GFP, cherry	0	0	0
TAG	52	5	GFP, cherry	0	0	0
TAG	54	1	GFP, cherry	0	3.97802	4.92417
TAG	54	2	GFP, cherry	0	4.38182	4.96311
TAG	54	3	GFP, cherry	0	0	0
TAG	56	1	GFP, cherry	2.31744	2.69763	0
TAG	56	2	GFP, cherry	0	2.49666	2.49167
TAG	58	3	GFP, cherry	0	0	0
TAG	34	0	PyK, cherry	4.93005	5.91148	8.49946
TAG	36	0	PyK, cherry	346.753	476.678	485.894
TAG	36	1	PyK, cherry	13.0082	14.6562	16.0485
TAG	38	0	PyK, cherry	1429.3	1741.8	1698.6
TAG	38	1	PyK, cherry	173.895	228.85	221.571
TAG	38	2	PyK, cherry	5.45251	7.72369	0
TAG	40	0	PyK, cherry	1923.68	1758.31	1679.82
TAG	40	1	PyK, cherry	502.371	603.616	551.95
TAG	40	2	PyK, cherry	33.2748	40.2244	40.0888
TAG	42	0	PyK, cherry	887.863	635.495	635.764
TAG	42	1	PyK, cherry	846.479	1050.31	989.789
TAG	42	2	PyK, cherry	94.674	119.706	117.162
TAG	42	3	PyK, cherry	4.73213	6.16475	6.45317
TAG	44	0	PyK, cherry	216.526	115.848	130.118
TAG	44	1	PyK, cherry	973.169	1089.09	1108.86
TAG	44	2	PyK, cherry	271.835	343.3	353.682
TAG	44	3	PyK, cherry	21.3696	34.7101	40.361
TAG	46	0	PyK, cherry	0	0	0
TAG	46	1	PyK, cherry	740.953	625.17	690.626
TAG	46	2	PyK, cherry	390.72	391.077	434.182
TAG	46	3	PyK, cherry	66.3807	82.6235	107.49
TAG	46	4	PyK, cherry	6.23236	9.20131	13.4001
TAG	48	0	PyK, cherry	23.2816	0	0
TAG	48	1	PyK, cherry	283.693	181.554	236.493
TAG	48	2	PyK, cherry	242.732	184.703	237.135
TAG	48	3	PyK, cherry	85.8566	70.2441	96.6399
TAG	48	4	PyK, cherry	11.4946	14.145	18.3509
TAG	50	1	PyK, cherry	66.5684	35.1762	40.1652
TAG	50	2	PyK, cherry	73.8153	42.3385	61.0482
TAG	50	3	PyK, cherry	35.4609	23.907	36.9431
TAG	50	4	PyK, cherry	11.6644	10.1788	13.2951
TAG	50	5	PyK, cherry	0	0	0
TAG	52	1	PyK, cherry	23.3223	8.90613	9.93932
TAG	52	2	PyK, cherry	21.0274	0	12.4154
TAG	52	3	PyK, cherry	10.1169	0	9.4221
TAG	52	4	PyK, cherry	0	0	0
TAG	52	5	PyK, cherry	0	0	0
TAG	54	1	PyK, cherry	7.55573	0	3.22189
TAG	54	2	PyK, cherry	10.1975	4.71481	4.6498
TAG	54	3	PyK, cherry	0	0	0
TAG	56	1	PyK, cherry	0	0	3.18252
TAG	56	2	PyK, cherry	4.90811	0	3.49576
TAG	58	3	PyK, cherry	0	0	0
TAG	34	0	CPT2, PyK	2.66455	5.32657	7.97725
TAG	36	0	CPT2, PyK	135.877	337.818	382.148
TAG	36	1	CPT2, PyK	4.66474	13.911	16.6189
TAG	38	0	CPT2, PyK	541.687	1099.21	1428.95
TAG	38	1	CPT2, PyK	68.0205	156.914	207.213
TAG	38	2	CPT2, PyK	0	0	0
TAG	40	0	CPT2, PyK	565.557	897.529	1482.6
TAG	40	1	CPT2, PyK	176.128	341.887	559.177
TAG	40	2	CPT2, PyK	14.2533	26.1656	39.7223
TAG	42	0	CPT2, PyK	209.564	295.147	543.283
TAG	42	1	CPT2, PyK	227.567	550.702	922.09
TAG	42	2	CPT2, PyK	30.1902	69.6639	116.899
TAG	42	3	CPT2, PyK	1.60937	3.35554	3.73888
TAG	44	0	CPT2, PyK	53.3196	58.6391	106.947
TAG	44	1	CPT2, PyK	210.376	585.377	954.427
TAG	44	2	CPT2, PyK	61.5074	176.661	261.241
TAG	44	3	CPT2, PyK	6.2187	17.6864	16.953
TAG	46	0	CPT2, PyK	0	0	0
TAG	46	1	CPT2, PyK	141.46	364.476	593.48
TAG	46	2	CPT2, PyK	72.0676	192.36	287.169
TAG	46	3	CPT2, PyK	14.6359	39.921	38.7113
TAG	46	4	CPT2, PyK	0	4.66559	0
TAG	48	0	CPT2, PyK	0	0	0
TAG	48	1	CPT2, PyK	62.8424	129.734	211.084
TAG	48	2	CPT2, PyK	45.5948	103.119	158.255
TAG	48	3	CPT2, PyK	15.3556	35.2697	42.089
TAG	48	4	CPT2, PyK	3.95759	7.69407	6.49995
TAG	50	1	CPT2, PyK	16.0075	25.3611	36.0387
TAG	50	2	CPT2, PyK	19.8063	34.9793	51.448
TAG	50	3	CPT2, PyK	10.4045	17.8135	20.64
TAG	50	4	CPT2, PyK	5.71265	8.06009	6.73884
TAG	50	5	CPT2, PyK	0	0	0
TAG	52	1	CPT2, PyK	0	6.23814	8.64905
TAG	52	2	CPT2, PyK	0	0	0
TAG	52	3	CPT2, PyK	0	0	7.53983
TAG	52	4	CPT2, PyK	0	0	0
TAG	52	5	CPT2, PyK	2.21735	2.75028	0
TAG	54	1	CPT2, PyK	0	0	0
TAG	54	2	CPT2, PyK	2.55972	3.58087	0
TAG	54	3	CPT2, PyK	0	0	0
TAG	56	1	CPT2, PyK	0	2.51056	0
TAG	56	2	CPT2, PyK	0	0	0
TAG	58	3	CPT2, PyK	0	0	0
TAG	34	0	MTPα, PyK	5.71445	11.4529	11.919
TAG	36	0	MTPα, PyK	307.736	554.347	467.372
TAG	36	1	MTPα, PyK	10.1416	20.8282	16.9246
TAG	38	0	MTPα, PyK	972.112	2164.68	1845.11
TAG	38	1	MTPα, PyK	108.637	206.215	175.942
TAG	38	2	MTPα, PyK	0	0	0
TAG	40	0	MTPα, PyK	709.35	2174.48	1985.41
TAG	40	1	MTPα, PyK	219.828	508.047	470.647
TAG	40	2	MTPα, PyK	16.7529	40.7316	29.724
TAG	42	0	MTPα, PyK	232.415	845.578	832.641
TAG	42	1	MTPα, PyK	348.678	917.368	887.999
TAG	42	2	MTPα, PyK	42.9064	108.815	95.5705
TAG	42	3	MTPα, PyK	2.28416	8.39083	5.56511
TAG	44	0	MTPα, PyK	67.0509	193.349	171.515
TAG	44	1	MTPα, PyK	400.887	1195.27	1132.46
TAG	44	2	MTPα, PyK	128.843	332.329	299.109
TAG	44	3	MTPα, PyK	13.6273	49.4127	32.3028
TAG	46	0	MTPα, PyK	0	0	0
TAG	46	1	MTPα, PyK	293.676	900.739	885.63
TAG	46	2	MTPα, PyK	156.374	476.848	429.315
TAG	46	3	MTPα, PyK	39.5953	146.322	97.0896
TAG	46	4	MTPα, PyK	5.18994	18.2929	11.6547
TAG	48	0	MTPα, PyK	5.66678	0	0
TAG	48	1	MTPα, PyK	116.914	350.436	343.686
TAG	48	2	MTPα, PyK	90.1524	315.934	280.24
TAG	48	3	MTPα, PyK	35.404	137.763	105.711
TAG	48	4	MTPα, PyK	7.40115	26.8192	17.0366
TAG	50	1	MTPα, PyK	29.9096	71.8048	67.9922
TAG	50	2	MTPα, PyK	34.3529	92.3307	91.4525
TAG	50	3	MTPα, PyK	18.8377	57.0651	47.7726
TAG	50	4	MTPα, PyK	7.08895	23.4264	15.5996
TAG	50	5	MTPα, PyK	0	0	0
TAG	52	1	MTPα, PyK	9.90742	15.7822	15.9253
TAG	52	2	MTPα, PyK	0	17.4524	18.5287
TAG	52	3	MTPα, PyK	0	14.6753	11.7887
TAG	52	4	MTPα, PyK	0	0	0
TAG	52	5	MTPα, PyK	1.8262	0	2.80442
TAG	54	1	MTPα, PyK	3.89522	5.12861	5.3913
TAG	54	2	MTPα, PyK	4.19088	7.05282	6.45065
TAG	54	3	MTPα, PyK	0	3.33439	0
TAG	56	1	MTPα, PyK	0	0	2.79698
TAG	56	2	MTPα, PyK	0	3.56925	0
TAG	58	3	MTPα, PyK	0	0	0
TAG	34	0	CPT2, cherry	3.40534	4.30924	8.10763
TAG	36	0	CPT2, cherry	184.669	253.43	455.743
TAG	36	1	CPT2, cherry	7.51228	9.47101	18.3985
TAG	38	0	CPT2, cherry	916.166	1331.89	1977.16
TAG	38	1	CPT2, cherry	102.328	138.724	251.065
TAG	38	2	CPT2, cherry	3.83149	0	8.6446
TAG	40	0	CPT2, cherry	1541.71	1903.78	2581.94
TAG	40	1	CPT2, cherry	373.371	471.876	799.043
TAG	40	2	CPT2, cherry	22.8648	24.4429	49.733
TAG	42	0	CPT2, cherry	905.85	877.836	1218.06
TAG	42	1	CPT2, cherry	835.36	1058.19	1718.01
TAG	42	2	CPT2, cherry	86.4368	94.7138	182.869
TAG	42	3	CPT2, cherry	4.20428	3.78907	7.14211
TAG	44	0	CPT2, cherry	230.542	175.511	281.857
TAG	44	1	CPT2, cherry	1189.16	1345.54	2267.51
TAG	44	2	CPT2, cherry	279.413	302.157	590.569
TAG	44	3	CPT2, cherry	18.1886	20.9968	48.6959
TAG	46	0	CPT2, cherry	0	0	0
TAG	46	1	CPT2, cherry	1022.88	902.327	1592.36
TAG	46	2	CPT2, cherry	515.835	416.094	856.162
TAG	46	3	CPT2, cherry	61.8324	55.0823	148.395
TAG	46	4	CPT2, cherry	4.97342	4.77151	13.0355
TAG	48	0	CPT2, cherry	0	0	0
TAG	48	1	CPT2, cherry	451.72	317.137	586.232
TAG	48	2	CPT2, cherry	369.788	230.281	528.306
TAG	48	3	CPT2, cherry	115.128	66.274	179.025
TAG	48	4	CPT2, cherry	12.0753	9.13591	28.041
TAG	50	1	CPT2, cherry	94.2652	57.8817	122.674
TAG	50	2	CPT2, cherry	128.256	64.0905	157.82
TAG	50	3	CPT2, cherry	56.3997	28.9852	75.3763
TAG	50	4	CPT2, cherry	14.4416	10.3255	30.5367
TAG	50	5	CPT2, cherry	0	0	0
TAG	52	1	CPT2, cherry	27.1004	14.1528	29.1076
TAG	52	2	CPT2, cherry	29.879	12.2081	35.1534
TAG	52	3	CPT2, cherry	14.2833	7.37772	19.86
TAG	52	4	CPT2, cherry	0	0	8.76173
TAG	52	5	CPT2, cherry	0	0	0
TAG	54	1	CPT2, cherry	10.1706	4.87714	9.01378
TAG	54	2	CPT2, cherry	10.7266	5.81737	9.0434
TAG	54	3	CPT2, cherry	0	0	0
TAG	56	1	CPT2, cherry	0	3.03224	0
TAG	56	2	CPT2, cherry	0	5.20185	0
TAG	58	3	CPT2, cherry	0	3.78658	0
TAG	34	0	MTPα, cherry	3.0704	3.08896	6.30659
TAG	36	0	MTPα, cherry	102.257	247.702	206.429
TAG	36	1	MTPα, cherry	4.04565	8.04539	8.04063
TAG	38	0	MTPα, cherry	468.928	1153.88	1152.42
TAG	38	1	MTPα, cherry	50.8562	113.1	94.9261
TAG	38	2	MTPα, cherry	0	0	0
TAG	40	0	MTPα, cherry	599.441	1489.27	1795.02
TAG	40	1	MTPα, cherry	151.415	357.067	348.179
TAG	40	2	MTPα, cherry	9.25438	26.1291	21.6425
TAG	42	0	MTPα, cherry	275.256	689.485	926.297
TAG	42	1	MTPα, cherry	295.633	798.892	826.248
TAG	42	2	MTPα, cherry	34.0027	84.3393	74.8836
TAG	42	3	MTPα, cherry	0	6.31631	4.15274
TAG	44	0	MTPα, cherry	72.3886	156.148	211.3
TAG	44	1	MTPα, cherry	357.135	1110.75	1185.69
TAG	44	2	MTPα, cherry	95.846	320.513	275.882
TAG	44	3	MTPα, cherry	5.71906	44.6775	29.2166
TAG	46	0	MTPα, cherry	24.1937	0	0
TAG	46	1	MTPα, cherry	277.471	836.687	1058.67
TAG	46	2	MTPα, cherry	130.186	510.217	475.32
TAG	46	3	MTPα, cherry	18.0603	132.59	90.5051
TAG	46	4	MTPα, cherry	0	14.8711	11.4659
TAG	48	0	MTPα, cherry	7.40902	0	0
TAG	48	1	MTPα, cherry	120.63	303.924	472.937
TAG	48	2	MTPα, cherry	83.0909	345.643	347.214
TAG	48	3	MTPα, cherry	23.2426	161.553	125.869
TAG	48	4	MTPα, cherry	3.19407	31.837	21.1331
TAG	50	1	MTPα, cherry	28.9947	55.9586	89.3116
TAG	50	2	MTPα, cherry	31.0256	92.24	116.94
TAG	50	3	MTPα, cherry	12.0292	67.2239	56.64
TAG	50	4	MTPα, cherry	5.51594	28.5528	21.2933
TAG	50	5	MTPα, cherry	0	3.79106	0
TAG	52	1	MTPα, cherry	10.1501	13.3389	18.2948
TAG	52	2	MTPα, cherry	0	16.2676	22.5288
TAG	52	3	MTPα, cherry	0	15.3583	13.6826
TAG	52	4	MTPα, cherry	0	0	2.84939
TAG	52	5	MTPα, cherry	0	3.63561	0
TAG	54	1	MTPα, cherry	0	3.93844	6.29248
TAG	54	2	MTPα, cherry	0	5.15971	6.79563
TAG	54	3	MTPα, cherry	0	3.40927	0
TAG	56	1	MTPα, cherry	0	3.1355	3.92664
TAG	56	2	MTPα, cherry	2.07644	0	3.15864
TAG	58	3	MTPα, cherry	0	0	0

## Sheet: Plasmamembrane lipids
Head
species	carbons	n saturation	genotype	sample 1	sample 2	sample 3
PC	26	0	GFP, cherry	0	0	0
PC	28	0	GFP, cherry	10.3925	0	11.2024
PC	28	1	GFP, cherry	10.9068	0	0
PC	30	0	GFP, cherry	15.0531	0	0
PC	30	1	GFP, cherry	69.3828	37.2905	49.1948
PC	30	2	GFP, cherry	6.14233	3.41425	0
PC	32	0	GFP, cherry	31.0998	26.4844	29.7209
PC	32	1	GFP, cherry	130.77	86.6129	116.355
PC	32	2	GFP, cherry	129.201	73.039	94.8917
PC	32	3	GFP, cherry	11.2444	9.52198	10.0803
PC	34	1	GFP, cherry	134.895	110.925	128.474
PC	34	2	GFP, cherry	241.684	179.421	205.446
PC	34	3	GFP, cherry	133.044	123.571	144.448
PC	36	1	GFP, cherry	20.9551	17.6382	20.1864
PC	36	2	GFP, cherry	80.6479	64.3515	70.735
PC	36	3	GFP, cherry	183.945	145.504	164.49
PC	36	4	GFP, cherry	141.414	118.778	138.632
PC	26	0	PyK, cherry	0	0	0
PC	28	0	PyK, cherry	5.1095	0	0
PC	28	1	PyK, cherry	4.12065	0	0
PC	30	0	PyK, cherry	8.83264	0	0
PC	30	1	PyK, cherry	42.2114	36.0674	35.1039
PC	30	2	PyK, cherry	0	0	0
PC	32	0	PyK, cherry	29.8432	28.164	24.9237
PC	32	1	PyK, cherry	107.865	77.0721	92.401
PC	32	2	PyK, cherry	109.654	74.356	80.299
PC	32	3	PyK, cherry	9.55517	7.52989	8.03526
PC	34	1	PyK, cherry	129.596	105.074	112.235
PC	34	2	PyK, cherry	226.684	145.984	176.633
PC	34	3	PyK, cherry	144.539	92.9705	115.951
PC	36	1	PyK, cherry	22.6138	22.3529	19.9485
PC	36	2	PyK, cherry	69.4583	60.4877	71.2403
PC	36	3	PyK, cherry	186.043	115.399	147.329
PC	36	4	PyK, cherry	148.144	89.8259	118.652
PC	26	0	CPT2, PyK	0	0	8.86631
PC	28	0	CPT2, PyK	5.16722	0	13.1962
PC	28	1	CPT2, PyK	7.49472	0	15.1679
PC	30	0	CPT2, PyK	0	0	0
PC	30	1	CPT2, PyK	30.5348	53.3736	79.8779
PC	30	2	CPT2, PyK	3.80009	0	9.64499
PC	32	0	CPT2, PyK	28.8611	31.3072	38.5567
PC	32	1	CPT2, PyK	75.2092	108.89	151.659
PC	32	2	CPT2, PyK	69.7343	107.429	154.38
PC	32	3	CPT2, PyK	9.07809	10.0598	12.8755
PC	34	1	CPT2, PyK	115.176	127.688	150.725
PC	34	2	CPT2, PyK	191.831	206.646	256.152
PC	34	3	CPT2, PyK	123.632	130.4	146.631
PC	36	1	CPT2, PyK	17.3642	20.2586	22.0117
PC	36	2	CPT2, PyK	73.22	75.4274	85.6635
PC	36	3	CPT2, PyK	178.496	158.777	162.223
PC	36	4	CPT2, PyK	144.063	129.308	0
PC	26	0	MTPα, PyK	6.01749	0	0
PC	28	0	MTPα, PyK	10.498	0	0
PC	28	1	MTPα, PyK	10.8751	0	0
PC	30	0	MTPα, PyK	12.2542	0	0
PC	30	1	MTPα, PyK	47.5226	34.2127	31.9245
PC	30	2	MTPα, PyK	6.99143	0	0
PC	32	0	MTPα, PyK	30.4954	27.2466	26.1905
PC	32	1	MTPα, PyK	111.208	91.0199	89.3809
PC	32	2	MTPα, PyK	112.245	80.8757	85.1276
PC	32	3	MTPα, PyK	12.3422	9.07751	7.99287
PC	34	1	MTPα, PyK	143.029	115.41	122.306
PC	34	2	MTPα, PyK	240.593	193.618	194.583
PC	34	3	MTPα, PyK	151.524	131.043	125.433
PC	36	1	MTPα, PyK	21.7394	20.4916	19.3208
PC	36	2	MTPα, PyK	84.6555	69.9592	72.35
PC	36	3	MTPα, PyK	193.034	148.205	148.623
PC	36	4	MTPα, PyK	0	136.094	123.263
PC	26	0	CPT2, cherry	0	0	0
PC	28	0	CPT2, cherry	0	0	0
PC	28	1	CPT2, cherry	0	0	0
PC	30	0	CPT2, cherry	9.01552	9.65951	0
PC	30	1	CPT2, cherry	40.5353	56.8793	38.3521
PC	30	2	CPT2, cherry	0	0	0
PC	32	0	CPT2, cherry	34.6076	34.0089	34.5655
PC	32	1	CPT2, cherry	109.873	115.983	102.738
PC	32	2	CPT2, cherry	110.348	116.926	94.3054
PC	32	3	CPT2, cherry	9.2923	0	9.10271
PC	34	1	CPT2, cherry	129.044	129.869	135.738
PC	34	2	CPT2, cherry	214.393	203.452	205.975
PC	34	3	CPT2, cherry	136.751	123.87	131.637
PC	36	1	CPT2, cherry	19.8125	21.0268	20.5346
PC	36	2	CPT2, cherry	73.9322	73.4677	84.1605
PC	36	3	CPT2, cherry	175.295	147.26	159.509
PC	36	4	CPT2, cherry	133.917	117.406	132.631
PC	26	0	MTPα, cherry	0	0	0
PC	28	0	MTPα, cherry	9.59502	0	0
PC	28	1	MTPα, cherry	11.3741	0	0
PC	30	0	MTPα, cherry	13.3225	0	0
PC	30	1	MTPα, cherry	63.0318	26.5722	52.8696
PC	30	2	MTPα, cherry	6.12583	0	0
PC	32	0	MTPα, cherry	38.217	27.0062	35.7753
PC	32	1	MTPα, cherry	117.427	69.4366	119.613
PC	32	2	MTPα, cherry	142.232	66.7424	113.697
PC	32	3	MTPα, cherry	11.7892	10.5948	12.3921
PC	34	1	MTPα, cherry	137.632	97.9351	140.143
PC	34	2	MTPα, cherry	249.219	171.427	236.191
PC	34	3	MTPα, cherry	132.268	128.946	154.739
PC	36	1	MTPα, cherry	23.5298	21.1925	26.6453
PC	36	2	MTPα, cherry	80.0495	58.4316	77.1886
PC	36	3	MTPα, cherry	191.775	158.469	180.628
PC	36	4	MTPα, cherry	151.879	140.706	162.851
PE	26	0	GFP, cherry	4.11766	0	0
PE	28	0	GFP, cherry	5.93453	0	0
PE	28	1	GFP, cherry	4.21289	0	0
PE	30	0	GFP, cherry	8.14237	0	5.13039
PE	30	1	GFP, cherry	67.8013	37.8116	57.4112
PE	32	0	GFP, cherry	4.92789	0	0
PE	32	1	GFP, cherry	200.63	154.699	188.373	CPT2 cherry	MTP cherry
PE	32	2	GFP, cherry	109.781	64.8329	90.0638	2561.3	2714.31
PE	32	3	GFP, cherry	0	0	0	2539.33	2093.79
PE	34	1	GFP, cherry	332.767	270.49	312.82	2519.31	2843.37
PE	34	2	GFP, cherry	347.81	232.17	287.827
PE	34	3	GFP, cherry	182.578	146.302	170.492
PE	34	4	GFP, cherry	12.225	10.6426	11.1739
PE	36	1	GFP, cherry	94.0455	73.946	85.0996
PE	36	2	GFP, cherry	327.067	211.662	262.402
PE	36	3	GFP, cherry	543.555	454.331	491.941
PE	36	4	GFP, cherry	260.955	206.186	232.39
PE	36	5	GFP, cherry	117.164	105.185	113.318
PE	36	6	GFP, cherry	35.0056	39.6438	48.8433
PE	38	1	GFP, cherry	6.65508	5.36292	5.90656
PE	38	2	GFP, cherry	5.62955	4.50064	0
PE	38	3	GFP, cherry	6.79575	4.6271	5.47353
PE	26	0	PyK, cherry	2.3726	0	0
PE	28	0	PyK, cherry	2.98892	0	0
PE	28	1	PyK, cherry	3.05539	0	0
PE	30	0	PyK, cherry	5.15741	0	3.9532
PE	30	1	PyK, cherry	37.0819	31.2265	34.411
PE	32	0	PyK, cherry	4.50395	4.79582	0
PE	32	1	PyK, cherry	185.333	116.212	161.021
PE	32	2	PyK, cherry	76.7643	62.9536	68.2496
PE	32	3	PyK, cherry	2.26608	0	0
PE	34	1	PyK, cherry	358.055	230.059	298.914
PE	34	2	PyK, cherry	326.465	210.223	279.8
PE	34	3	PyK, cherry	194.369	147.894	175.143
PE	34	4	PyK, cherry	13.4265	10.3954	11.085
PE	36	1	PyK, cherry	118.462	105.737	102.471
PE	36	2	PyK, cherry	282.61	232.668	259.482
PE	36	3	PyK, cherry	496.578	435.416	462.316
PE	36	4	PyK, cherry	279.862	195.14	224.403
PE	36	5	PyK, cherry	114.663	103.613	105.197
PE	36	6	PyK, cherry	37.2885	46.2062	38.999
PE	38	1	PyK, cherry	11.5308	8.03869	6.52324
PE	38	2	PyK, cherry	6.89145	4.75315	5.10412
PE	38	3	PyK, cherry	6.77716	5.20254	5.68097
PE	26	0	CPT2, PyK	2.62739	0	10.6599
PE	28	0	CPT2, PyK	3.47312	0	9.06239
PE	28	1	CPT2, PyK	3.04031	7.95187	14.6258
PE	30	0	CPT2, PyK	6.05981	5.27818	10.9568
PE	30	1	CPT2, PyK	32.1477	65.1607	112.942
PE	32	0	CPT2, PyK	5.824	0	5.11183
PE	32	1	CPT2, PyK	117.816	197.634	305.048
PE	32	2	CPT2, PyK	58.0198	95.255	169.797
PE	32	3	CPT2, PyK	0	0	0
PE	34	1	CPT2, PyK	302.839	332.835	483.08
PE	34	2	CPT2, PyK	277.518	316.595	462.909
PE	34	3	CPT2, PyK	160.836	196.966	257.619
PE	34	4	CPT2, PyK	12.3402	17.7747	23.4704
PE	36	1	CPT2, PyK	84.5165	93.4433	115.684
PE	36	2	CPT2, PyK	256.343	271.719	372.863
PE	36	3	CPT2, PyK	426.221	482.341	525.416
PE	36	4	CPT2, PyK	234.593	254.736	273.275
PE	36	5	CPT2, PyK	107.345	125.125	118.923
PE	36	6	CPT2, PyK	32.4622	47.5533	43.0531
PE	38	1	CPT2, PyK	7.93841	9.16732	10.3638
PE	38	2	CPT2, PyK	5.14019	0	5.23574
PE	38	3	CPT2, PyK	5.68918	5.71009	4.92442
PE	26	0	MTPα, PyK	6.33149	0	0
PE	28	0	MTPα, PyK	5.83114	0	3.59325
PE	28	1	MTPα, PyK	5.96611	0	0
PE	30	0	MTPα, PyK	8.11629	4.04073	6.05955
PE	30	1	MTPα, PyK	52.162	30.0131	31.5492
PE	32	0	MTPα, PyK	5.915	0	5.1103
PE	32	1	MTPα, PyK	213.65	172.438	190.283
PE	32	2	MTPα, PyK	95.3254	77.4708	69.6386
PE	32	3	MTPα, PyK	4.08932	0	3.61765
PE	34	1	MTPα, PyK	411.807	309.832	324.957
PE	34	2	MTPα, PyK	401.946	323.912	312.603
PE	34	3	MTPα, PyK	230.038	207.613	201.037
PE	34	4	MTPα, PyK	15.565	12.7267	15.9378
PE	36	1	MTPα, PyK	107.037	88.05	95.7606
PE	36	2	MTPα, PyK	305.954	237.176	252.107
PE	36	3	MTPα, PyK	512.51	480.736	475.012
PE	36	4	MTPα, PyK	265.973	252.426	238.596
PE	36	5	MTPα, PyK	106.469	114.386	108
PE	36	6	MTPα, PyK	35.2486	38.2004	37.5327
PE	38	1	MTPα, PyK	16.3358	10.4897	13.2503
PE	38	2	MTPα, PyK	8.94257	4.98915	5.81557
PE	38	3	MTPα, PyK	7.45622	8.43458	7.24967
PE	26	0	CPT2 cherry	0	0	0
PE	28	0	CPT2 cherry	2.26909	0	0
PE	28	1	CPT2 cherry	0	4.87295	0
PE	30	0	CPT2 cherry	5.05086	3.87177	0
PE	30	1	CPT2 cherry	40.4689	76.7916	34.6981
PE	32	0	CPT2 cherry	4.37166	0	0
PE	32	1	CPT2 cherry	232.297	221.121	169.351
PE	32	2	CPT2 cherry	82.8541	105.168	73.5669
PE	32	3	CPT2 cherry	0	0	0
PE	34	1	CPT2 cherry	356.952	327.408	342.779
PE	34	2	CPT2 cherry	349.809	313.006	319.266
PE	34	3	CPT2 cherry	191.724	178.976	198.243
PE	34	4	CPT2 cherry	13.2775	12.2212	10.6184
PE	36	1	CPT2 cherry	93.9071	97.4125	102.978
PE	36	2	CPT2 cherry	295.475	287.824	306.05
PE	36	3	CPT2 cherry	489.084	494.356	521.482
PE	36	4	CPT2 cherry	235.824	234.15	247.432
PE	36	5	CPT2 cherry	109.48	121.098	130.737
PE	36	6	CPT2 cherry	38.409	45.0816	49.7286
PE	38	1	CPT2 cherry	7.31043	6.09659	6.8798
PE	38	2	CPT2 cherry	5.61962	4.67192	0
PE	38	3	CPT2 cherry	7.11411	5.20777	5.50474
PE	26	0	MTPα, cherry	5.2483	0	0
PE	28	0	MTPα, cherry	6.1696	0	0
PE	28	1	MTPα, cherry	5.21251	0	0
PE	30	0	MTPα, cherry	7.1788	0	4.44651
PE	30	1	MTPα, cherry	66.0552	21.4599	50.9778
PE	32	0	MTPα, cherry	3.76475	0	0
PE	32	1	MTPα, cherry	219.32	118.951	206.324
PE	32	2	MTPα, cherry	118.052	58.5453	109.614
PE	32	3	MTPα, cherry	2.85056	0	0
PE	34	1	MTPα, cherry	352.336	258.239	358.855
PE	34	2	MTPα, cherry	366.52	265.377	350.067
PE	34	3	MTPα, cherry	188.403	176.689	205.405
PE	34	4	MTPα, cherry	11.4746	9.30827	20.0884
PE	36	1	MTPα, cherry	106.706	88.3484	113.45
PE	36	2	MTPα, cherry	327.714	217.434	303.583
PE	36	3	MTPα, cherry	502.345	476.117	593.256
PE	36	4	MTPα, cherry	255.235	231.536	292.888
PE	36	5	MTPα, cherry	111.164	119.641	147.357
PE	36	6	MTPα, cherry	37.2069	45.8619	64.2467
PE	38	1	MTPα, cherry	7.96833	6.27695	9.51435
PE	38	2	MTPα, cherry	7.23627	0	5.25153
PE	38	3	MTPα, cherry	6.15037	0	8.05008
PI	30	1	GFP, cherry	0	0	0
PI	32	0	GFP, cherry	0	1.03016	0
PI	32	1	GFP, cherry	32.0886	21.0519	28.5685
PI	32	2	GFP, cherry	13.0499	0	0
PI	34	1	GFP, cherry	23.9543	15.0039	19.2842
PI	34	2	GFP, cherry	49.9582	32.9846	41.607
PI	34	3	GFP, cherry	21.7188	20.7117	24.3861
PI	34	4	GFP, cherry	3.15688	0	0
PI	36	1	GFP, cherry	3.02479	0	0
PI	36	2	GFP, cherry	22.091	15.2364	17.2346
PI	36	3	GFP, cherry	61.2806	45.4299	52.3699
PI	36	4	GFP, cherry	67.1889	56.0816	65.2653
PI	36	5	GFP, cherry	22.6419	21.6659	23.611
PI	36	6	GFP, cherry	10.7085	10.2928	12.2746
PI	30	1	PyK, cherry	0	0	0
PI	32	0	PyK, cherry	0.652958	0	0
PI	32	1	PyK, cherry	21.8258	19.2358	23.4353
PI	32	2	PyK, cherry	5.52327	0	0
PI	34	1	PyK, cherry	14.1416	12.055	14.989
PI	34	2	PyK, cherry	35.9116	24.1469	35.9458
PI	34	3	PyK, cherry	23.6199	17.1707	22.3224
PI	34	4	PyK, cherry	4.52454	0	0
PI	36	1	PyK, cherry	0	0	0
PI	36	2	PyK, cherry	16.325	11.5028	16.4021
PI	36	3	PyK, cherry	52.8611	37.4803	50.0861
PI	36	4	PyK, cherry	70.2202	53.6263	64.3724
PI	36	5	PyK, cherry	21.6192	17.0136	19.328
PI	36	6	PyK, cherry	10.6379	9.70106	8.78259
PI	30	1	CPT2, PyK	0	0	0
PI	32	0	CPT2, PyK	0.614496	0	0
PI	32	1	CPT2, PyK	11.0048	26.9214	37.5115
PI	32	2	CPT2, PyK	0	0	14.5649
PI	34	1	CPT2, PyK	11.103	16.1103	26.397
PI	34	2	CPT2, PyK	33.1956	37.5676	54.3987
PI	34	3	CPT2, PyK	22.3759	26.3581	25.1663
PI	34	4	CPT2, PyK	4.58298	0	5.76285
PI	36	1	CPT2, PyK	0	0	0
PI	36	2	CPT2, PyK	18.125	17.4764	27.4046
PI	36	3	CPT2, PyK	54.1445	52.3149	62.9869
PI	36	4	CPT2, PyK	67.1477	68.5977	72.9411
PI	36	5	CPT2, PyK	22.6928	23.1856	20.9919
PI	36	6	CPT2, PyK	9.06993	10.8012	10.3501
PI	30	1	MTPα, PyK	0	0	0
PI	32	0	MTPα, PyK	0	0	0
PI	32	1	MTPα, PyK	21.5062	23.0268	21.0236
PI	32	2	MTPα, PyK	6.51298	0	0
PI	34	1	MTPα, PyK	18.314	16.0778	15.7699
PI	34	2	MTPα, PyK	46.0981	39.1892	34.3233
PI	34	3	MTPα, PyK	29.9135	29.2047	24.004
PI	34	4	MTPα, PyK	6.52041	0	0
PI	36	1	MTPα, PyK	3.7956	0	0
PI	36	2	MTPα, PyK	21.8197	17.3196	17.6568
PI	36	3	MTPα, PyK	64.2708	55.2766	49.3451
PI	36	4	MTPα, PyK	70.7007	70.9394	65.0621
PI	36	5	MTPα, PyK	23.493	28.018	22.664
PI	36	6	MTPα, PyK	9.60881	12.2257	11.8187
PI	30	1	CPT2, cherry	0	0	0
PI	32	0	CPT2, cherry	0	0	0
PI	32	1	CPT2, cherry	30.3241	32.8426	31.2585
PI	32	2	CPT2, cherry	9.20445	6.9674	0
PI	34	1	CPT2, cherry	18.4836	19.4657	19.7056
PI	34	2	CPT2, cherry	44.0679	34.8036	39.1736
PI	34	3	CPT2, cherry	21.583	19.5885	25.5925
PI	34	4	CPT2, cherry	3.66904	0	0
PI	36	1	CPT2, cherry	0	0	0
PI	36	2	CPT2, cherry	19.1804	15.193	21.0642
PI	36	3	CPT2, cherry	54.3653	44.4417	56.6137
PI	36	4	CPT2, cherry	65.9982	59.0792	71.8062
PI	36	5	CPT2, cherry	24.6153	20.8861	26.6941
PI	36	6	CPT2, cherry	11.225	9.88174	13.0317
PI	30	1	MTPα, cherry	2.77598	0	0
PI	32	0	MTPα, cherry	0	0	0
PI	32	1	MTPα, cherry	29.8314	14.5189	42.1822
PI	32	2	MTPα, cherry	12.8111	0	0
PI	34	1	MTPα, cherry	23.3253	8.40875	23.7478
PI	34	2	MTPα, cherry	47.884	30.3742	47.149
PI	34	3	MTPα, cherry	21.9681	22.1221	29.1107
PI	34	4	MTPα, cherry	3.20389	0	5.10525
PI	36	1	MTPα, cherry	3.35258	0	0
PI	36	2	MTPα, cherry	21.8802	14.5868	19.0551
PI	36	3	MTPα, cherry	57.5247	43.7041	58.008
PI	36	4	MTPα, cherry	70.0588	58.0358	78.4181
PI	36	5	MTPα, cherry	26.0389	26.2173	29.2557
PI	36	6	MTPα, cherry	8.93716	11.4638	14.2041
PS	34	0	GFP, cherry	1.72869	1.13961	1.35806
PS	34	1	GFP, cherry	12.5748	10.5889	8.77548
PS	34	2	GFP, cherry	13.9654	9.65657	11.6111
PS	34	3	GFP, cherry	6.3052	0	0
PS	36	1	GFP, cherry	18.5053	15.5056	16.2834
PS	36	2	GFP, cherry	85.6017	68.0758	77.4076
PS	36	3	GFP, cherry	61.6774	55.7198	59.1391
PS	36	4	GFP, cherry	43.9862	35.715	39.2395
PS	36	5	GFP, cherry	45.4914	33.0403	33.5566
PS	36	6	GFP, cherry	63.8733	60.1977	64.4257
PS	38	1	GFP, cherry	0	0	0
PS	38	2	GFP, cherry	0	0	0
PS	38	3	GFP, cherry	29.4037	50.856	54.2575
PS	34	0	PyK, cherry	1.62525	1.18444	1.53481
PS	34	1	PyK, cherry	11.7749	9.37019	10.7006
PS	34	2	PyK, cherry	10.8101	7.86757	9.0514
PS	34	3	PyK, cherry	7.21597	0	0
PS	36	1	PyK, cherry	19.8912	19.451	18.2792
PS	36	2	PyK, cherry	79.466	70.7545	73.4261
PS	36	3	PyK, cherry	55.7885	49.5491	47.6746
PS	36	4	PyK, cherry	42.639	36.7523	36.3787
PS	36	5	PyK, cherry	38.3498	35.2854	32.7965
PS	36	6	PyK, cherry	56.6832	64.8598	56.8347
PS	38	1	PyK, cherry	3.37247	0	0
PS	38	2	PyK, cherry	3.17946	0	0
PS	38	3	PyK, cherry	25.0926	0	51.9298
PS	34	0	CPT2, PyK	1.47577	1.83437	0
PS	34	1	CPT2, PyK	10.8449	12.6569	13.0086
PS	34	2	CPT2, PyK	9.75033	9.94226	14.3358
PS	34	3	CPT2, PyK	5.95888	7.55383	6.70403
PS	36	1	CPT2, PyK	15.1024	19.0579	20.0324
PS	36	2	CPT2, PyK	66.9706	67.5666	87.1865
PS	36	3	CPT2, PyK	42.1121	52.3028	48.4734
PS	36	4	CPT2, PyK	34.4987	39.0202	39.2516
PS	36	5	CPT2, PyK	32.507	37.1324	33.3922
PS	36	6	CPT2, PyK	35.6811	57.814	58.2565
PS	38	1	CPT2, PyK	0	0	0
PS	38	2	CPT2, PyK	0	0	0
PS	38	3	CPT2, PyK	29.4548	53.7648	0
PS	34	0	MTPα, PyK	1.77613	0	1.37934
PS	34	1	MTPα, PyK	12.1942	12.6213	10.5664
PS	34	2	MTPα, PyK	11.4692	9.95181	9.51371
PS	34	3	MTPα, PyK	6.4754	0	0
PS	36	1	MTPα, PyK	20.344	20.7877	18.5659
PS	36	2	MTPα, PyK	75.3378	71.0139	65.9121
PS	36	3	MTPα, PyK	52.8954	58.1775	51.1095
PS	36	4	MTPα, PyK	34.6405	39.198	36.8208
PS	36	5	MTPα, PyK	36.8872	37.2052	35.7255
PS	36	6	MTPα, PyK	50.1755	64.8427	60.4729
PS	38	1	MTPα, PyK	5.47053	0	0
PS	38	2	MTPα, PyK	3.75604	0	0
PS	38	3	MTPα, PyK	22.6413	65.6982	0
PS	34	0	CPT2, cherry	0	2.42095	0
PS	34	1	CPT2, cherry	11.2311	11.844	13.2494
PS	34	2	CPT2, cherry	11.4747	11.6865	10.4092
PS	34	3	CPT2, cherry	6.31449	6.79107	0
PS	36	1	CPT2, cherry	17.1671	17.7481	19.4584
PS	36	2	CPT2, cherry	79.5671	77.6229	82.6144
PS	36	3	CPT2, cherry	55.9615	55.053	57.342
PS	36	4	CPT2, cherry	39.9426	39.7965	41.5526
PS	36	5	CPT2, cherry	39.531	37.5458	38.0401
PS	36	6	CPT2, cherry	61.0798	72.2185	71.7547
PS	38	1	CPT2, cherry	0	0	0
PS	38	2	CPT2, cherry	0	0	0
PS	38	3	CPT2, cherry	24.8471	57.3835	0
PS	34	0	MTPα, cherry	2.22127	0	0
PS	34	1	MTPα, cherry	11.1515	8.99775	10.8061
PS	34	2	MTPα, cherry	11.8523	0	9.38383
PS	34	3	MTPα, cherry	6.45783	0	7.24387
PS	36	1	MTPα, cherry	18.3874	16.8889	19.7319
PS	36	2	MTPα, cherry	76.9664	63.6671	75.6934
PS	36	3	MTPα, cherry	55.0918	56.6471	58.7418
PS	36	4	MTPα, cherry	35.2112	34.88	39.6173
PS	36	5	MTPα, cherry	38.9279	32.7903	36.6712
PS	36	6	MTPα, cherry	53.751	61.6796	66.4656
PS	38	1	MTPα, cherry	0	0	0
PS	38	2	MTPα, cherry	0	0	0
PS	38	3	MTPα, cherry	22.8375	60.1825	63.8495
