# Supplementary material for: Glycolytically impaired Drosophila glial cells fuel neural metabolism via β-oxidation
Source: Nat Commun. 2023 May 24;14:2996. doi: 10.1038/s41467-023-38813-x (PMC10209077; doi:10.1038/s41467-023-38813-x)
Supplement: Supplementary file 7 — Supplementary data 4 [file 41467_2023_38813_MOESM7_ESM.xlsx]

## Sheet: DAG
DAG in hemolymph
				sample
species	carbons	n saturation	genotype	sample 1	sample 2	sample 3
DAG	30	1	GFP, cherry	1.1813	0	0.952681
DAG	30	2	GFP, cherry	0	0	0
DAG	31	1	GFP, cherry	0	0	0
DAG	31	2	GFP, cherry	0	0	0
DAG	32	1	GFP, cherry	1.1141	0	0
DAG	32	2	GFP, cherry	1.09297	0	1.02607
DAG	32	3	GFP, cherry	0	0	0
DAG	33	1	GFP, cherry	0	0	0
DAG	33	2	GFP, cherry	0	0	0
DAG	34	0	GFP, cherry	0	1.03011	0
DAG	34	1	GFP, cherry	0	0	0
DAG	34	2	GFP, cherry	0	0	0
DAG	34	3	GFP, cherry	0	0	0
DAG	35	1	GFP, cherry	0	0	0
DAG	35	2	GFP, cherry	0	0	0
DAG	36	1	GFP, cherry	0	2.44491	0
DAG	36	2	GFP, cherry	0	0	0
DAG	36	3	GFP, cherry	0	0	0
DAG	30	1	PyK, cherry	1.0709	0	32.3391
DAG	30	2	PyK, cherry	0	0	5.68066
DAG	31	1	PyK, cherry	0	0	2.37217
DAG	31	2	PyK, cherry	0	0	0
DAG	32	1	PyK, cherry	1.30315	0	20.3469
DAG	32	2	PyK, cherry	0.834393	0	15.4618
DAG	32	3	PyK, cherry	0	0	2.97001
DAG	33	1	PyK, cherry	0	0	0
DAG	33	2	PyK, cherry	0	0	0
DAG	34	0	PyK, cherry	0	0	0
DAG	34	1	PyK, cherry	0	0	8.23964
DAG	34	2	PyK, cherry	0	0	9.50439
DAG	34	3	PyK, cherry	0	0	4.81002
DAG	35	1	PyK, cherry	0	0	0
DAG	35	2	PyK, cherry	0	0	0
DAG	36	1	PyK, cherry	0	0	0
DAG	36	2	PyK, cherry	0	0	2.42792
DAG	36	3	PyK, cherry	0	0	3.01445
DAG	30	1	CPT2, PyK	0.718651	0	20.1623
DAG	30	2	CPT2, PyK	0	0	3.5389
DAG	31	1	CPT2, PyK	0	0	3.92622
DAG	31	2	CPT2, PyK	0	0	1.33795
DAG	32	1	CPT2, PyK	0.997038	1.42969	9.33606
DAG	32	2	CPT2, PyK	0.857352	0	6.18911
DAG	32	3	CPT2, PyK	0	0	2.81894
DAG	33	1	CPT2, PyK	0	0	2.71779
DAG	33	2	CPT2, PyK	0	0	1.94723
DAG	34	0	CPT2, PyK	0	2.15061	0
DAG	34	1	CPT2, PyK	0.754934	1.50539	4.14385
DAG	34	2	CPT2, PyK	0	0	3.80782
DAG	34	3	CPT2, PyK	0	0	1.67838
DAG	35	1	CPT2, PyK	0	0	1.97465
DAG	35	2	CPT2, PyK	0	0	1.18518
DAG	36	1	CPT2, PyK	0	1.71365	1.95958
DAG	36	2	CPT2, PyK	0	0	1.83369
DAG	36	3	CPT2, PyK	0	0	0
DAG	30	1	MTPα, PyK	0	3.95635	0
DAG	30	2	MTPα, PyK	0	1.81089	0
DAG	31	1	MTPα, PyK	0	1.0239	0
DAG	31	2	MTPα, PyK	0	0	0
DAG	32	1	MTPα, PyK	0	2.72642	0
DAG	32	2	MTPα, PyK	0.881479	2.46498	0
DAG	32	3	MTPα, PyK	0	0	0
DAG	33	1	MTPα, PyK	0	0	0
DAG	33	2	MTPα, PyK	0	0	0
DAG	34	0	MTPα, PyK	0	0	0
DAG	34	1	MTPα, PyK	0	1.62929	0
DAG	34	2	MTPα, PyK	0	1.88666	0
DAG	34	3	MTPα, PyK	0	0	0
DAG	35	1	MTPα, PyK	0	0	0
DAG	35	2	MTPα, PyK	0	0	0
DAG	36	1	MTPα, PyK	0	0	0
DAG	36	2	MTPα, PyK	0	0	0
DAG	36	3	MTPα, PyK	0	0	0
DAG	30	1	CPT2, cherry	2.7495	8.68173
DAG	30	2	CPT2, cherry	1.02601	2.16782
DAG	31	1	CPT2, cherry	0	1.45451
DAG	31	2	CPT2, cherry	0	0
DAG	32	1	CPT2, cherry	1.54067	5.77274
DAG	32	2	CPT2, cherry	1.25964	4.98322
DAG	32	3	CPT2, cherry	0	0
DAG	33	1	CPT2, cherry	0	1.155
DAG	33	2	CPT2, cherry	0	0
DAG	34	0	CPT2, cherry	0	0
DAG	34	1	CPT2, cherry	0.932268	2.81208
DAG	34	2	CPT2, cherry	0	2.81707
DAG	34	3	CPT2, cherry	0	1.42661
DAG	35	1	CPT2, cherry	0	0
DAG	35	2	CPT2, cherry	0	0
DAG	36	1	CPT2, cherry	0	0.897008
DAG	36	2	CPT2, cherry	0	0
DAG	36	3	CPT2, cherry	0	1.03091
DAG	30	1	MTPα, cherry	0.919464	5.01107
DAG	30	2	MTPα, cherry	0	1.9781
DAG	31	1	MTPα, cherry	0	0.848346
DAG	31	2	MTPα, cherry	0	0
DAG	32	1	MTPα, cherry	0	3.25712
DAG	32	2	MTPα, cherry	0.859734	2.95857
DAG	32	3	MTPα, cherry	0	0
DAG	33	1	MTPα, cherry	0	0
DAG	33	2	MTPα, cherry	0	0
DAG	34	0	MTPα, cherry	0	0
DAG	34	1	MTPα, cherry	0	2.06025
DAG	34	2	MTPα, cherry	0	1.86036
DAG	34	3	MTPα, cherry	0	0
DAG	35	1	MTPα, cherry	0	0
DAG	35	2	MTPα, cherry	0	0
DAG	36	1	MTPα, cherry	0	0
DAG	36	2	MTPα, cherry	0	0
DAG	36	3	MTPα, cherry	0	0

## Sheet: Phospholipids
species	carbons	n saturation	genotype	sample 1	sample 2	sample 3
PA	32	0	GFP, cherry	0	0	0
PA	36	0	GFP, cherry	0	0	0
PA	36	3	GFP, cherry	0	0	0
PC	32	1	GFP, cherry	0	0	0
PC	32	2	GFP, cherry	0	0	0
PC	34	0	GFP, cherry	0	1.79451	0
PC	34	1	GFP, cherry	0	0	0
PC	34	2	GFP, cherry	0	0	0
PC	34	3	GFP, cherry	0	0	0
PC	36	2	GFP, cherry	0	0	0
PC	36	4	GFP, cherry	0	0	0
PE	30	0	GFP, cherry	0	0	0
PE	30	1	GFP, cherry	0	0	0
PE	31	1	GFP, cherry	0	0	0
PE	32	1	GFP, cherry	2.04986	0	2.07121
PE	32	2	GFP, cherry	0	0	0
PE	32	3	GFP, cherry	0	0	0
PE	33	2	GFP, cherry	0	0	0
PE	34	0	GFP, cherry	0	0.261335	0
PE	34	1	GFP, cherry	0	0	0
PE	34	2	GFP, cherry	0	0	0
PE	34	3	GFP, cherry	0	0	0
PE	34	4	GFP, cherry	0	0	0
PE	35	2	GFP, cherry	0	0	0
PE	36	2	GFP, cherry	0	0	0
PE	36	3	GFP, cherry	0	0	0
PE	36	4	GFP, cherry	0	0	0
PE	36	5	GFP, cherry	0	0	0
PG	32	0	GFP, cherry	0	0	0
PG	32	1	GFP, cherry	0	0	0
PG	32	2	GFP, cherry	0	0	0
PG	34	1	GFP, cherry	0	0	0
PG	34	2	GFP, cherry	0	0	0
PG	34	3	GFP, cherry	0	0	0
PG	36	2	GFP, cherry	0	0	0
PG	36	3	GFP, cherry	0	0	0
PG	36	4	GFP, cherry	0	0	0
PI	30	1	GFP, cherry	0	0	0
PI	32	0	GFP, cherry	0	0	0
PI	32	1	GFP, cherry	0	0	0
PI	32	2	GFP, cherry	0	0	0
PI	34	1	GFP, cherry	0	0	0
PI	34	2	GFP, cherry	0	0	0
PI	34	3	GFP, cherry	0	0	0
PI	35	2	GFP, cherry	0	0	0
PI	36	2	GFP, cherry	0	0	0
PI	36	3	GFP, cherry	0	0	0
PI	36	4	GFP, cherry	0	0	0
PS	28	0	GFP, cherry	0	0	0
PS	34	1	GFP, cherry	0	0	0
PS	34	2	GFP, cherry	0	0	0
PS	35	3	GFP, cherry	0	0	0
PS	36	1	GFP, cherry	0	0	0
PS	36	2	GFP, cherry	0	0	0
PS	36	3	GFP, cherry	0	0	0
PA	32	0	PyK, cherry	0	0	0
PA	36	0	PyK, cherry	0	0	0
PA	36	3	PyK, cherry	0	0	0
PC	32	1	PyK, cherry	0	0	28.4822
PC	32	2	PyK, cherry	0	0	29.121
PC	34	0	PyK, cherry	0	0	0
PC	34	1	PyK, cherry	0	0	17.2242
PC	34	2	PyK, cherry	0	0	40.2262
PC	34	3	PyK, cherry	0	0	20.8297
PC	36	2	PyK, cherry	0	0	8.35919
PC	36	4	PyK, cherry	0	0	13.4474
PE	30	0	PyK, cherry	0	0	1.6386
PE	30	1	PyK, cherry	0	0	20.4355
PE	31	1	PyK, cherry	0	0	1.25102
PE	32	1	PyK, cherry	1.87984	0	176.691
PE	32	2	PyK, cherry	0	0	41.2635
PE	32	3	PyK, cherry	0	0	0
PE	33	2	PyK, cherry	0	0	2.18609
PE	34	0	PyK, cherry	0	0	0
PE	34	1	PyK, cherry	0	0	118.187
PE	34	2	PyK, cherry	0	0	136.698
PE	34	3	PyK, cherry	0	0	39.7197
PE	34	4	PyK, cherry	0	0	3.15718
PE	35	2	PyK, cherry	0	0	1.37722
PE	36	2	PyK, cherry	0	0	54.8255
PE	36	3	PyK, cherry	0	0	69.2546
PE	36	4	PyK, cherry	0	0	30.0795
PE	36	5	PyK, cherry	0	0	4.33479
PG	32	0	PyK, cherry	0	0	2.52624
PG	32	1	PyK, cherry	0	0	1.23726
PG	32	2	PyK, cherry	0	0	2.7573
PG	34	1	PyK, cherry	0	0	2.93816
PG	34	2	PyK, cherry	0	0	3.4278
PG	34	3	PyK, cherry	0	0	1.83301
PG	36	2	PyK, cherry	0	0	1.10695
PG	36	3	PyK, cherry	0	0	0.931272
PG	36	4	PyK, cherry	0	0	0.623844
PI	30	1	PyK, cherry	0	0	1.28316
PI	32	0	PyK, cherry	0	0	0.802892
PI	32	1	PyK, cherry	0	0	7.38121
PI	32	2	PyK, cherry	0	0	5.60934
PI	34	1	PyK, cherry	0	0	5.00398
PI	34	2	PyK, cherry	0	0	18.5281
PI	34	3	PyK, cherry	0	0	7.93804
PI	35	2	PyK, cherry	0	0	0
PI	36	2	PyK, cherry	0	0	9.04357
PI	36	3	PyK, cherry	0	0	16.2393
PI	36	4	PyK, cherry	0	0	5.52639
PS	28	0	PyK, cherry	0	0	0
PS	34	1	PyK, cherry	0	0	1.68527
PS	34	2	PyK, cherry	0	0	3.21077
PS	35	3	PyK, cherry	0	6.82713	0
PS	36	1	PyK, cherry	0	0	2.14852
PS	36	2	PyK, cherry	0	0	11.5165
PS	36	3	PyK, cherry	0	0	4.67594
PA	32	0	CPT2, PyK	0	0	0
PA	36	0	CPT2, PyK	0	0	0
PA	36	3	CPT2, PyK	0	0	0
PC	32	1	CPT2, PyK	0	0	8.03343
PC	32	2	CPT2, PyK	0	0	8.50676
PC	34	0	CPT2, PyK	0	0	2.27719
PC	34	1	CPT2, PyK	0	0	5.75344
PC	34	2	CPT2, PyK	0	0	12.715
PC	34	3	CPT2, PyK	0	0	8.91806
PC	36	2	CPT2, PyK	0	0	0
PC	36	4	CPT2, PyK	0	0	8.85318
PE	30	0	CPT2, PyK	0	0	0
PE	30	1	CPT2, PyK	0	0	17.436
PE	31	1	CPT2, PyK	0	0	0
PE	32	1	CPT2, PyK	0	0	75.5397
PE	32	2	CPT2, PyK	0	0	18.9272
PE	32	3	CPT2, PyK	0	0	1.64938
PE	33	2	CPT2, PyK	0	0	0
PE	34	0	CPT2, PyK	0.132567	0.344929	0
PE	34	1	CPT2, PyK	0	0	54.2972
PE	34	2	CPT2, PyK	0	0	62.302
PE	34	3	CPT2, PyK	0	0	22.7826
PE	34	4	CPT2, PyK	0	0	3.08593
PE	35	2	CPT2, PyK	0	0	0
PE	36	2	CPT2, PyK	0	0	25.9422
PE	36	3	CPT2, PyK	0	0	48.4648
PE	36	4	CPT2, PyK	0	0	27.2529
PE	36	5	CPT2, PyK	0	0	5.30873
PG	32	0	CPT2, PyK	0	0	1.46749
PG	32	1	CPT2, PyK	0	0	0
PG	32	2	CPT2, PyK	0	0	1.28739
PG	34	1	CPT2, PyK	0	0	1.1016
PG	34	2	CPT2, PyK	0	0	1.6904
PG	34	3	CPT2, PyK	0	0	1.04706
PG	36	2	CPT2, PyK	0	0	1.36966
PG	36	3	CPT2, PyK	0	0	0
PG	36	4	CPT2, PyK	0	0	0
PI	30	1	CPT2, PyK	0	0	0
PI	32	0	CPT2, PyK	0	0	0.779824
PI	32	1	CPT2, PyK	0	0	0
PI	32	2	CPT2, PyK	0	0	0
PI	34	1	CPT2, PyK	0	0	0
PI	34	2	CPT2, PyK	0	0	3.59552
PI	34	3	CPT2, PyK	0	0	1.91576
PI	35	2	CPT2, PyK	0	0	0
PI	36	2	CPT2, PyK	0	0	1.49625
PI	36	3	CPT2, PyK	0	0	4.0176
PI	36	4	CPT2, PyK	0	0	2.89993
PS	28	0	CPT2, PyK	0	0	0
PS	34	1	CPT2, PyK	0	0	0
PS	34	2	CPT2, PyK	0	0	0
PS	35	3	CPT2, PyK	0	0	0
PS	36	1	CPT2, PyK	0	0	0
PS	36	2	CPT2, PyK	0	0	1.46816
PS	36	3	CPT2, PyK	0	0	4.69209
PA	32	0	MTPα, PyK	0.614316	0	0
PA	36	0	MTPα, PyK	0	0.689768	0
PA	36	3	MTPα, PyK	0	0	0
PC	32	1	MTPα, PyK	0	3.67926	0
PC	32	2	MTPα, PyK	0	4.72225	0
PC	34	0	MTPα, PyK	0	0	0
PC	34	1	MTPα, PyK	0	0	0
PC	34	2	MTPα, PyK	0	5.76108	0
PC	34	3	MTPα, PyK	0	0	0
PC	36	2	MTPα, PyK	0	0	0
PC	36	4	MTPα, PyK	0	0	0
PE	30	0	MTPα, PyK	0	0	0
PE	30	1	MTPα, PyK	0	7.29165	0
PE	31	1	MTPα, PyK	0	0	0
PE	32	1	MTPα, PyK	0	28.9255	0
PE	32	2	MTPα, PyK	0	7.94824	0
PE	32	3	MTPα, PyK	0	0	0
PE	33	2	MTPα, PyK	0	0	0
PE	34	0	MTPα, PyK	0	0	0
PE	34	1	MTPα, PyK	0	16.7374	0
PE	34	2	MTPα, PyK	0	19.3872	0
PE	34	3	MTPα, PyK	0	8.6491	0
PE	34	4	MTPα, PyK	0	0	0
PE	35	2	MTPα, PyK	0	0	0
PE	36	2	MTPα, PyK	0	9.24059	0
PE	36	3	MTPα, PyK	0	19.3187	0
PE	36	4	MTPα, PyK	0	11.9271	0
PE	36	5	MTPα, PyK	0	2.33597	0
PG	32	0	MTPα, PyK	0	0	0
PG	32	1	MTPα, PyK	0	0	0
PG	32	2	MTPα, PyK	0	0	0
PG	34	1	MTPα, PyK	0	0	0
PG	34	2	MTPα, PyK	0	0.809323	0
PG	34	3	MTPα, PyK	0	0	0
PG	36	2	MTPα, PyK	0	0	0
PG	36	3	MTPα, PyK	0	0	0
PG	36	4	MTPα, PyK	0	0	0
PI	30	1	MTPα, PyK	0	0	0
PI	32	0	MTPα, PyK	0	0	0
PI	32	1	MTPα, PyK	0	1.04749	0
PI	32	2	MTPα, PyK	0	0	0
PI	34	1	MTPα, PyK	0	1.00822	0
PI	34	2	MTPα, PyK	0	1.29997	0
PI	34	3	MTPα, PyK	0	0	0
PI	35	2	MTPα, PyK	0	0	0
PI	36	2	MTPα, PyK	0	0	0
PI	36	3	MTPα, PyK	0	1.17593	0
PI	36	4	MTPα, PyK	0	1.01152	0
PS	28	0	MTPα, PyK	0	0	0
PS	34	1	MTPα, PyK	0	0	0
PS	34	2	MTPα, PyK	0	0	0
PS	35	3	MTPα, PyK	0	1.38486	0
PS	36	1	MTPα, PyK	0	0	0
PS	36	2	MTPα, PyK	0	0	0
PS	36	3	MTPα, PyK	0	4.09894	0
PA	32	0	CPT2, cherry	0	0
PA	36	0	CPT2, cherry	0	0
PA	36	3	CPT2, cherry	0	0
PC	32	1	CPT2, cherry	0	3.57036
PC	32	2	CPT2, cherry	0	3.78602
PC	34	0	CPT2, cherry	0	0
PC	34	1	CPT2, cherry	0	0
PC	34	2	CPT2, cherry	0	4.35197
PC	34	3	CPT2, cherry	0	0
PC	36	2	CPT2, cherry	0	0
PC	36	4	CPT2, cherry	0	0
PE	30	0	CPT2, cherry	0	0
PE	30	1	CPT2, cherry	0	5.59767
PE	31	1	CPT2, cherry	0	0
PE	32	1	CPT2, cherry	4.40498	27.9384
PE	32	2	CPT2, cherry	0	7.18155
PE	32	3	CPT2, cherry	0	0
PE	33	2	CPT2, cherry	0	0
PE	34	0	CPT2, cherry	0	0
PE	34	1	CPT2, cherry	1.87645	14.5667
PE	34	2	CPT2, cherry	1.51364	16.2697
PE	34	3	CPT2, cherry	0	3.96406
PE	34	4	CPT2, cherry	0	0
PE	35	2	CPT2, cherry	0	0
PE	36	2	CPT2, cherry	0	6.97219
PE	36	3	CPT2, cherry	0	7.06449
PE	36	4	CPT2, cherry	0	2.96215
PE	36	5	CPT2, cherry	0	0
PG	32	0	CPT2, cherry	0	0.567921
PG	32	1	CPT2, cherry	0	0
PG	32	2	CPT2, cherry	0	0.585953
PG	34	1	CPT2, cherry	0	0
PG	34	2	CPT2, cherry	0	0
PG	34	3	CPT2, cherry	0	0
PG	36	2	CPT2, cherry	0	0
PG	36	3	CPT2, cherry	0	0
PG	36	4	CPT2, cherry	0	0
PI	30	1	CPT2, cherry	0	0
PI	32	0	CPT2, cherry	0	0
PI	32	1	CPT2, cherry	0	1.17161
PI	32	2	CPT2, cherry	0	0.817103
PI	34	1	CPT2, cherry	0	0.680106
PI	34	2	CPT2, cherry	0	1.91705
PI	34	3	CPT2, cherry	0	0.853982
PI	35	2	CPT2, cherry	0	0.760988
PI	36	2	CPT2, cherry	0	0
PI	36	3	CPT2, cherry	0	1.20184
PI	36	4	CPT2, cherry	0	0.576066
PS	28	0	CPT2, cherry	0	0
PS	34	1	CPT2, cherry	0	0
PS	34	2	CPT2, cherry	0	0
PS	35	3	CPT2, cherry	0	0
PS	36	1	CPT2, cherry	0	0
PS	36	2	CPT2, cherry	0	0.775743
PS	36	3	CPT2, cherry	0	5.09556
PA	32	0	MTPα, cherry	0	0
PA	36	0	MTPα, cherry	0	0
PA	36	3	MTPα, cherry	0	0.579812
PC	32	1	MTPα, cherry	0	1.46603
PC	32	2	MTPα, cherry	0	0
PC	34	0	MTPα, cherry	0	1.34039
PC	34	1	MTPα, cherry	0	0
PC	34	2	MTPα, cherry	0	0
PC	34	3	MTPα, cherry	0	0
PC	36	2	MTPα, cherry	0	0
PC	36	4	MTPα, cherry	0	0
PE	30	0	MTPα, cherry	0	0
PE	30	1	MTPα, cherry	0	4.86894
PE	31	1	MTPα, cherry	0	0
PE	32	1	MTPα, cherry	1.2941	22.5662
PE	32	2	MTPα, cherry	0	5.04814
PE	32	3	MTPα, cherry	0	0
PE	33	2	MTPα, cherry	0	0
PE	34	0	MTPα, cherry	0	0
PE	34	1	MTPα, cherry	0	12.2444
PE	34	2	MTPα, cherry	0	10.8304
PE	34	3	MTPα, cherry	0	2.49823
PE	34	4	MTPα, cherry	0	0
PE	35	2	MTPα, cherry	0	0
PE	36	2	MTPα, cherry	0	3.83362
PE	36	3	MTPα, cherry	0	3.77166
PE	36	4	MTPα, cherry	0	2.19024
PE	36	5	MTPα, cherry	0	0
PG	32	0	MTPα, cherry	0	0
PG	32	1	MTPα, cherry	0	0
PG	32	2	MTPα, cherry	0	0
PG	34	1	MTPα, cherry	0	0
PG	34	2	MTPα, cherry	0	0
PG	34	3	MTPα, cherry	0	0
PG	36	2	MTPα, cherry	0	0
PG	36	3	MTPα, cherry	0	0
PG	36	4	MTPα, cherry	0	0
PI	30	1	MTPα, cherry	0	0.671087
PI	32	0	MTPα, cherry	0	0
PI	32	1	MTPα, cherry	0	0.657935
PI	32	2	MTPα, cherry	0	0
PI	34	1	MTPα, cherry	0	0
PI	34	2	MTPα, cherry	0	0.877363
PI	34	3	MTPα, cherry	0	0.767515
PI	35	2	MTPα, cherry	0	0
PI	36	2	MTPα, cherry	0	0
PI	36	3	MTPα, cherry	0	0.579005
PI	36	4	MTPα, cherry	0	0
PS	28	0	MTPα, cherry	1.91735	0
PS	34	1	MTPα, cherry	0	0
PS	34	2	MTPα, cherry	0	0
PS	35	3	MTPα, cherry	0	0.968154
PS	36	1	MTPα, cherry	0	0
PS	36	2	MTPα, cherry	0	0
PS	36	3	MTPα, cherry	0	6.09267
